# Supplementary material for: Identification of Pharmacologically Tractable Protein Complexes in Cancer Using the R-Based Network Clustering and Visualization Program MCODER
Source: Biomed Res Int. 2017 Jun 13;2017:1016305. doi: 10.1155/2017/1016305 (PMC5485287; doi:10.1155/2017/1016305)
Supplement: Supplementary file 1 — Supplementary Data 1: List of differentially expressed proteins in each of the molecular subtypes of HGS-OvCa and CRC. Supplementary Data 2: Identified submodules for each of the molecular subtypes of HGS-OvCa and CRC. [file 1016305.f1.zip]

Archive with 2 entries (2 files):
- Supplementary Data 1.xlsx
- Supplementary Data 2.xlsx
