# Supplementary material for: Identification of Pharmacologically Tractable Protein Complexes in Cancer Using the R-Based Network Clustering and Visualization Program MCODER
Source: Biomed Res Int. 2017 Jun 13;2017:1016305. doi: 10.1155/2017/1016305 (PMC5485287; doi:10.1155/2017/1016305)
Supplement: Supplementary file 1 — Supplementary Data 1: List of differentially expressed proteins in each of the molecular subtypes of HGS-OvCa and CRC. Supplementary Data 2: Identified submodules for each of the molecular subtypes of HGS-OvCa and CRC. [file 1016305.f1.zip › Supplementary Data 1.xlsx]

## Sheet: README
Supplementary Data 1. List of differentially expressed proteins in each of the molecular subtypes of HGS-OvCa and CRC.
(a) Differentially expressed proteins for HGS-OvCa.
(b) Differentially expressed proteins for CRC.

## Sheet: a
Proliferative vs. Immunoreactive, Differentiated, Mesenchymal	Immunoreactive vs. Proliferative, Differentiated, Mesenchymal	Differentiated vs. Proliferative, Immunoreactive, Mesenchymal	Mesenchymal vs. Proliferative, Immunoreactive, Differentiated
MSI1	LGALS9	SUCLG2	NNMT
ZMYM3	PARP14	C21orf33	FN1
MAGED2	HCLS1	PPIF	PLS3
TRIM33	CYBB	APOA1BP	CALD1
CTNNBL1	TAPBP	ARMC10	CNN2
FUBP1	TAP1	IDH1	TAGLN
XPO5	FCER1G	HERC4	LRP1
TPR	FMNL1	DLD	TPM4
NUDT21	TAP2	SPR	FAP
NONO	GBP3	CAPN1	CTHRC1
PARP1	GBP2	GPD2	ACTN1
RPRD1B	CD14	HSPE1	LGALS1
DDX23	GBP1	MSLN	CDH11
NELFB	PTPRC	MDH2	GPX8
PSMB5	TYMP	ASS1	PDLIM5
POLR2A	LAP3	APRT	PDLIM7
RBM12	IFI30	PRDX5	PDLIM3
HNRNPA1	RNF213	EPS8L2	FHL3
RBBP7	CASP1	ACY1	PALLD
NXF1	PSMB9	GNAQ	CNN3
PPP4R2	PSMB10	TACSTD2	RCN3
MTA3	LGALS9B	VDAC1	RAB31
TOP1MT	CARD16	AHCYL1	PDLIM2
MAGOHB	STAT1	IDH3G	TPM2
HNRNPA1L2	PLEKHO2	ECI1	SH3PXD2B
PHGDH	PSMB8	TSTA3	ZYX
BUB3	HLA-A	C11orf54	FERMT2
SRSF12	FERMT3	S100A16	ANXA2
BRD3	GMFG	RNPEP	PICALM
MSH6	LACTB	LIN7C	FLNA
KDM1A	TRIM21	MUC16	CORO1C
PPIL1	ITGAX	AK2	ACTB
SNRNP200	HLA-B	ACADSB	MYH10
SRSF6	DTX3L	MUC1	BASP1
CBX5	KYNU	CLDN3	PLXDC2
SUPT16H	VAV1	SLC9A3R2	FLNC
CRNKL1	ITGB2	EPB41L1	SNX18
PCYOX1	B2M	AHCYL2	POSTN
U2AF1	ARHGDIB	SORD	ACTG1
RBBP4	NMI	MROH1	COL11A1
CHD4	RENBP	DKC1	MXRA5
BRD2	CORO1A	NDUFAB1	FBLN1
TIA1	SAMHD1	S100A6	VCAN
SRSF8	CD163	ECHS1	TPM1
MSI2	HLA-C	NHP2	ACTG2
NCBP1	APOL2	ITGB4	MMP2
PSMC1	OAS2	PYCRL	ACTA1
HNRNPH3	IFIT1	SLC25A12	ACTBL2
CHD5	IFIT3	MDH1	ALDH1L2
RBM4B	DOCK2	ISOC2	SFXN3
SMARCA5	GIMAP4	H2AFY	ACTA2
TOP2A	UBE2L6	GRHPR	SEPT11
XRCC1	GBP5	NIF3L1	MMP14
EHMT2	SERPINB9	PDCD6	POTEF
GTF2I	OSTF1	CBR1	CNN1
C12orf10	IFI35	PCDH1	FBLN2
CAD	CTSS	STXBP3	MYH9
XPO1	GBP4	CAPNS1	S100A10
DHX9	OAS3	TKT	NEFH
CSE1L	EVL	ARL8A	THBS2
CDC73	SH3BP1	SDHC	NEFM
GTF3C3	NCEH1	EML2	LEPREL2
HNRNPR	WARS	CYB5R1	MYO1D
RBM4	CD38	COQ9	SEC24D
PSMB6	CMPK2	DBT	NEXN
GTF3C5	CSK	QDPR	INA
MTA1	AIF1	LAD1	SEC23A
RBP1	ADRBK1	CTTN	VIM
WDR18	ALOX5	OPLAH	ACTN3
MSH2	LCP1	AFG3L2	ITGA5
SF3B3	HCK	GLRX5	DPYSL3
PSMD2	HLA-E	ESRP1	SPARC
FXR1	LSP1	IMMT	MYL9
SMEK2	IFI16	TUFM	CSRP2
SMARCD1	PARP9	FIS1	P4HA2
PRPF8	ARHGEF6	SELENBP1	MYL12B
HNRNPK	NCF1	CTNNA1	MYLK
HDAC1	LPXN	HIBCH	COMP
SMARCC1	GLRX	MCCC2	SPATS2L
SMARCB1	NFKB1	GPI	GOPC
SMARCA1	OPTN	COX4I1	MYO1E
HNRNPL	IFIT2	DNPEP	PTGIS
AKAP8L	PLEK	PDHB	ACSL1
ILKAP	NFKB2	AIFM1	IKBIP
CHD3	EPS15	SDHA	PLOD2
SRRT	PSME1	TSTD1	TIMP2
RANBP6	HLA-DPA1	THEM6	ILK
TIAL1	FNBP1	PRDX6	LEPRE1
NCOA5	PSMA5	CIB1	LIMA1
GLO1	TRIM22	KRT18	RTN4
PSMB7	ZC3HAV1	S100A14	LUZP1
FXR2	ELMO1	PDHA1	COL5A1
HNRNPU	STAB1	GSTK1	MPRIP
TOP1	PSMA3	ETFA	PDLIM4
STMN1	LYN	ATPIF1	C1S
U2AF1L4	STK10	CSTB	TGFB1I1
YY1	PYCARD	SYPL1	LXN
PRKDC	HTATIP2	PTGES2	FBLIM1
ADNP	IFIT5	ALDOA	PPP3CA
RBMX	STAT3	ETFB	CRMP1
DCAF7	PFN1	PTGR2	TPM3
WDR5	MYO1F	DCTPP1	PCOLCE
SSRP1	MX1	BCKDHA	SEPT8
UBXN7	TBXAS1	PHKB	MYL6
ACTL6A	NCK1	VDAC2	TAGLN3
HMGA2	PPP6R1	C2orf47	PTK7
UCHL1	MPP1	SUCLG1	RAI14
KIF1A	INPP5D	FOLR1	C1R
RBM39	PSME2	MCCC1	ARPC1B
LCLAT1	ICAM1	GNG12	PPFIBP1
DDX39A	CAPZB	SLC34A2	LMCD1
LIG3	MX2	IARS2	SNX3
KHDRBS1	SQRDL	FBL	TOM1
NASP	ARRB1	NCL	FAM114A1
PRKRA	SLFN5	SSH3	THY1
ACP1	NAGK	PARK7	GALNT1
CPSF7	SRP19	GLUD2	ALDH1B1
ALPL	CASP4	COX5B	DAB2
IGF2BP3	ISG15	PPA2	ITGAV
CTR9	ERAP1	GLUD1	FSCN1
SHMT2	GRB2	HSPA4	SERPINH1
TARDBP	STK4	PPA1	CILP
DDX17	CD44	EMD	CRTAP
PABPN1	PYHIN1	ATP1A4	TGM2
BCL2L2-PABPN1	HLA-DRA	ATP1A3	NT5E
RFC5	MNDA	SPON1	COL5A2
LZTFL1	PTPN6	ATP2B1	TMED7
USP39	SNAP29	IVD	TMED7-TICAM2
ILF2	CORO6	HSPA9	AEBP1
BRD4	SERPINB1	NOP56	ASPH
SYNCRIP	ZZEF1	ATP5C1	CEP170
NUP133	HLA-DRB3	SNCG	FKBP10
HNRNPAB	NSF	CRIP2	MSN
SF3B6	KARS	GAR1	ACTN2
SKP1	IL4I1	LMNA	ENAH
PSMD1	ME2	ATP2B2	PLEC
HNRNPH1	HLA-DPB1	MACROD1	SERPINF1
SLC16A1	STAT5A	RBM47	ANXA5
GNL1	BLVRA	SOD1	LUM
SUPT5H	LY75-CD302	SIAE	SEPT6
LAS1L	COTL1	ATP4A	MARCKS
CUL1	FGL2	HDGF	GOLGA3
MCM6	RAP2B	ATP1A2	MRC2
IK	DDX58	MPHOSPH10	SEPT2
HMGB3	BIN2	DDX52	PPP1R18
IPO5	ARHGAP4	KRT4	PLOD1
MOV10	SDF2L1	CAPNS2	SH3GL1
POLR2B	SAMD9	ABHD11	PRPH
UBA2	TRIM47	CDH1	SEC31A
CUL4B	HLA-DRB1	DDAH1	GFAP
SMARCC2	MYO1G	CELSR2	ECM1
HNRNPC	SOD2	SLC9A3R1	ANXA6
CDK2	ITGAM	S100A1	CKAP4
SMARCA2	DPYD	OPA3	AP2M1
AAAS	CARS	APPL1	PARVA
RPA1	UBA5	NME2	TLN1
HSP90AB1	AKR1A1	ANXA11	THBS1
TRMT112	DERA	S100A13	CALB2
MCM3	ALDH16A1	NNT	VCL
MEIS2	SMAP2	PKP4	SEPT7
MOGS	SRP68	HSPD1	LASP1
WBP11	CD47	GPX1	COL3A1
PRPF19	TPP1	SLC25A22	VCAM1
IPO9	CHMP4A	CPT2	ITGB5
ZMYM4	RAB7A	IDH3B	EEA1
TUBB	SRP54	ATP12A	SORBS3
RFC4	OGFR	DHRS11	ISLR
ZC3HAV1L	AP1B1	CBR4	FERMT1
COL18A1	SAMD9L	TATDN1	SPAG9
ESYT1	PLCG2	TRAP1	SURF4
C11orf31	CAMK2B	SLC25A31	MYL6B
HMGN2	RAP2A	LSR	MYH14
VTA1	DCK	ATP5A1	TLN2
SRSF9	PITPNB	SLC25A4	DPYSL2
TEX10	RAC2	CBR3	DCN
HNRNPH2	ARPC5	SPG7	AP2B1
WDR82	FAM129A	DLAT	FKBP7
FEN1	GNAI2	RSL1D1	COL12A1
SIN3A	UFM1	SLC25A1	DES
SAP30BP	MYO18A	NOP58	DUSP3
RFC2	ALCAM	CDH6	STX7
MEIS1	DOCK8	CAPN2	PLS1
SNRPA	TAOK3	NDRG1	AKAP13
PRPF4	CAMK2D	VDAC3	CTSK
PCBP2	PCK2	L2HGDH	RSU1
SF3A3	ANKFY1	RPE	HTRA1
ANP32B	NUB1	CAPS	COL8A1
SF3B5	ENTPD1	UTP14A	HOOK3
RGPD2	FAM49B	NME3	SH3GLB1
MATR3	CISD2	SLC4A2	CLIC4
SREK1	NMT1	ATP1A1	YIPF5
SRSF2	PARP10	PRKAR2A	TMEM43
RNF20	PSMA7	ALDOC	P4HA1
SYMPK	LIPA	IDH3A	HDLBP
MCM7	FKBP5	NUCKS1	ENTPD1
DDAH1	CD74	NUBPL	SLC16A3
RCN2	CAPG	GMPR2	SNX12
TNPO1	RAP2C	PKP3	COPG1
ISYNA1	MAN2A1	H2AFY2	ASPN
CTPS2	CORO1C	SLC12A2	PHLDB1
FUS	TRIM25	UQCRC1	KDELC2
HDAC2	DNAJC13	YWHAZ	MYH11
MCM2	GNA13	CTNNB1	TNC
EPCAM	ELMO2	SLC25A3	ENPP1
NOL9	FGR	KRT7	GPX7
SUGP2	ADPGK	HSD17B12	BGN
RALY	SCO1	SRI	GOLIM4
ARGLU1	MSN	ANK3	PAWR
IGF2BP2	PPP1R18	PDP1	ITGB1
RPRD1A	WASH1	PDCD6IP	LIMS1
RFC3	CAPZA1	ATIC	PPP1R12A
STRBP	GYG1	KRT16	SEPT4
PRPF40A	ABCE1	HIBADH	GPC6
NDRG2	STAT5B	ATP5D	FHL2
MCM5	FAM21A	BCKDHB	PAPSS2
LUC7L	CTSL	SERBP1	CSRP1
TUBB4A	CXorf38	MTX1	CAP1
RBM10	PCK1	FUK	CYB5R3
SF3B2	SCFD1	CTNNA2	STK3
LUC7L3	NCF2	ACAA1	RAP2C
SRSF4	EEFSEC	EVPL	HNMT
BCLAF1	WDR91	UBA1	SEC61B
USP13	SRP72	ANXA1	MYO1B
RANBP2	H6PD	ABCC4	AP3M1
TUBB2B	FAM49A	GSR	EHD2
SCAF4	RP2	HSPA6	FKBP9
SRSF1	MANF	SDHB	P4HB
ZMYND8	ATP2A3	TTLL12	ACTR3
ACIN1	PECAM1	SCRN2	SNX9
IPO8	CD97	AHNAK	OLFML3
RBM42	SWAP70	C8orf82	AP3B1
SGTA	NT5C3A	GMPR	SYNE1
SRSF7	GMDS	TMLHE	AOC3
SNRPB2	ACO2	NME1	AP2A1
YLPM1	RPS6KA3	FLII	GSN
TUBA1C	RAC1	CNDP2	LPP
NELFE	CBR3	PURA	F13A1
AHCY	DDX60	HSPB1	RAC3
PSMC2	ALDH2	PDXK	PRRC1
SPTBN1	TMX3	CRYZ	DBN1
TMPO	ATP6V1B2	MTCH2	ANXA1
TUBA8	CDV3	ZNF185	ARHGAP1
CBX1	GPNMB	ABHD16A	GLG1
TUBB2A	SERPINB8	ALDH7A1	RAB23
INTS3	EIF2AK2	APIP	RBMS2
PRRC2A	UBA7	PTK2	STK10
RCC2	C1QA	NHP2L1	CD44
TUBA1B	HLA-DRB5	TRIP6	PXDN
PRPF6	TXLNG	PEBP1	WDR1
TUBB8	OAS1	UQCRC2	COPB2
ITGA6	SP100	DSG2	C1QB
PNN	LGMN	MCU	RRBP1
PSMD11	DNAJC7	RPS19	TMEM214
NACC1	SPCS2	MECP2	PALM2-AKAP2
TUBA4A	RAB12	BCL2L1	MAP4
USP5	CLPP	NPEPL1	TGFBI
PTBP1	XPNPEP1	UTP15	EFEMP2
PSIP1	NAPA	ATP5L	FNDC3A
THOC2	RABGGTA	PLEC	EMILIN1
IRF2BP1	EFHD2	TNFAIP2	HSPG2
SLC29A1	AP3M1	DEPTOR	GLRX
BUD31	MTM1	PDHX	RAP2A
ILF3	GTPBP1	FARSA	ARCN1
CTPS1	KIAA0196	GAA	C19orf10
BZW1	ASCC3	CYCS	VAT1
EPM2AIP1	CCDC132	AK1	LAMA4
RBM25	EMC1	PARP4	SVIL
DRG1	UBA6	ATP2B4	VASP
TUBB4B	ARHGAP17	RUVBL1	LRRC59
ADI1	DNAJB11	HADHB	TMED9
SMC2	FOLR2	RCC1	THBS3
C7orf55-LUC7L2	USP15	TMOD1	AP2A2
POLR2H	FMNL2	AIF1L	DPYD
EFTUD2	ARPC1B	ATP2B3	CD109
GFPT1	PRKD2	TSPO	SNX4
PBX1	YARS	LRRFIP2	RAP1B
CTBP1	NEK7	NFU1	LIMS2
PAK4	BMP2K	RAD50	TAOK3
SRSF5	NIT2	TFAM	TMED10
UBE2N	PDCL3	TSPAN14	CLTB
TUBA3E	ATG3	SMS	RAB22A
XRCC6	VAMP8	KRT14	TGOLN2
NUP205	C1QB	SCRIB	TAGLN2
DDAH2	EHD3	KRT19	ARFGAP3
PGM3		ATP5O	TTC37
DPF2		TIMM8A	ATL3
CPSF2		SLC25A5	COL2A1
RBM14		MRE11A	EFEMP1
HSP90AA1		GRPEL1	MYO1G
RIF1		ATP5B	TRIP10
PABPC4		TOMM70A	FKBP11
WDR77		SSBP1	CAPN2
SMC4		COX6B1	PLTP
NELFA		ACAT1	MFAP2
HNRNPM		HMGN4	ARPC2
PRKACB		PAFAH1B2	LNPEP
CCAR2		PPL	ATP6V1B2
CHERP		KRT79	ARPC5
PCNA		ABHD14B	CAP2
PHF6		FH	ELMO2
PGRMC1			LMF2
ANKS1A			EXOC6B
ASH2L			C1QC
MCM4			ARHGAP18
SFPQ			CAST
NUP93			ARPC4
ZNF207			UACA
CDK11A			GLS
RBM17			KIAA1217
GSK3B			ANO6
NUP37			MAN2A1
STAG2			MYO1A
XPOT			UGP2
BSG			AP3D1
ARID1A			TMEM263
POLB			GPNMB
CTNNA2			ELMOD2
PCID2			CAMK2D
PFAS			FNDC3B
CTBP2			PTRF
RPA2			COPE
DDX39B			IMPA1
ARPC1A			HMCN1
SNRPA1			MAP1B
PTPLAD1			NCK2
PPP4C			GIT2
GATAD2A			BST1
OBSL1			C4BPA
CPNE1			ADH1A
RAN			PI4KA
DDX47			DYNC1LI2
PAFAH1B3			LTBP2
PTGES3			ARAP1
F11R			RAP2B
ANP32E			FABP4
FKBP4			ADH1B
NAP1L1			SUN2
HNRNPA2B1			STAT2
EIF4B			ARF4
SEPHS1			RDX
CD2BP2			ARL6IP5
PREP			MYO18A
HIST4H4			LMAN1
ORC3			RAP1GDS1
PLAA			SORBS1
AHSA1			C1QA
TMED4			MAP7D1
KHSRP			COPA
GDAP1			AP1B1
CPSF3			RRAS
EXOSC10			ACTN4
PSMC5			ITGAX
NUMA1			ACTR2
KIFC1			CAV1
PTMS			MYO1C
PUM1			CAPZB
LANCL2			COPB1
TOMM34			FAM21A
SMC3			KANK2
PRMT5			LCP1
TBC1D15			STX12
DNAJC9			FBN1
GCN1L1			RAP1A
NUDC			FHL1
EIF5B			FAM3C
TRIM28			RNH1
PAX8			IQGAP3
EMG1			DNAJC13
RBM26			TENC1
MECOM			FAF2
ATF7IP			SCAMP1
GSTM3			MVP
ASNA1			OSTF1
PPIH			TBC1D9B
NUP35			MNDA
SMC1A			TMOD3
EEF1A1			ADH1C
RALGAPB			MYO1F
IGF2BP1			APOL2
CIRH1A			DYSF
NAA50			WDFY1
SAE1			TMX3
GMPS			ITGA1
NCL			SEC61A1
LDHB			EPPK1
CKAP5			ALDH1A3
DEK			CAPG
AGRN			DCTD
DHPS			PTPN1
PFN2			ITGB2
HEXIM1			ICAM1
H3F3B			ALDH2
LSM7			CTSD
HIST2H3A			TXNDC5
HNRNPDL			CORO6
CCT4			BCAP29
UNC119B			PGAM1
OTUB1			PYCR1
RNMT			EHD4
IKBKAP			VPS18
HIST1H3J			GGT5
SCYL1			SOD2
DNM1L			CCDC91
SON			LSP1
HNRNPA0			PTGFRN
NUP107			PI4K2A
NFYB			TNS1
KPNA4			GPC4
LAMC1			PLIN3
TCEB1			PECAM1
RAVER1			PROS1
PBX2			C8B
PPIG			BAX
PNKP			AP2S1
RBMXL1			LMNA
IGFBP2			PPIC
TPP2			DOCK1
SRP14			ARHGDIA
PDS5B			RECQL
PLEKHA5			WASH1
HCFC1			MTDH
U2SURP			NAGK
PHF3			ASAP1
DNAJC10			LDHAL6A
MDK			TNS3
PSAT1			ARHGEF6
LAMB2			CORO1A
CUL4A			ACTR1A
ELAVL1			COL1A2
DDX6			CLTC
CAND1			GOLGA5
NIP7			CTSL
MTCH1			PLIN2
BIRC6			ATG7
CPSF1			LDHA
RPA3			TMED2
HNRNPUL1			NCF2
FUCA2			TYMP
TUBB6			LMO7
CKB			UAP1L1
STRAP			COL1A1
BCCIP			SFXN1
PGD			C2
GLYR1			DHX29
SRP9			SEC61A2
NUP98			EXOC7
TRMT6			VPS25
SSB			MYOF
PSMD14			PYGL
DNAJA1			FMNL1
FAM136A			RETSAT
PRUNE			ATP6V0D1
VRK1			CASP4
SF1			CBFB
ZC3H15			GMFG
PUS7			TRIOBP
CBX3			GBE1
UBE2V2			EHD3
HIST1H1B			FLNB
ATXN2L			PGAM2
EIF2B1			GNAI2
TCEA2			GSTO1
TXNDC17			SEC23IP
HIST3H3			ACAA2
SUMO1			S100A6
NSMCE4A			HLA-DPB1
VANGL2			NCLN
SART3			RAC1
DFFA			PTPRC
EDC3			COTL1
PSMC3			FAM114A2
PIGT			CORO7-PAM16
GPX7			ADA
MTA2			IQGAP1
HNRNPD			CDC42BPB
NUP160			COLGALT1
EEF1E1			CALU
SLC2A1			FERMT3
SLC25A13			CASK
BAZ1B			ACTR3B
ENPP4			ACLY
NUP210			PPP4R1
PDS5A			CTSB
CUL3			TNKS1BP1
MYEF2			CFB
SPG20			CAPZA2
BPHL			LHPP
SET			COL6A3
FKBP9			ANPEP
RTF1			KIAA0196
GSK3A			HMOX2
H2AFV			TBXAS1
DCUN1D1			GMPPA
TCEAL5
PSMD6
RBM34
TCEA1
PRPF4B
FDX1
DDB1
OARD1
TPPP3
NID1
MAT2A
FKBP3
QRICH1
FUBP3
QPRT
PRKACA
XRCC5
ALYREF
CPXM1
CIAPIN1
PIP4K2C
DNAJB6
TSN
ZC3H11A
RING1
LAMA5
OLA1
HIST1H1A
TCERG1
KIF11
TRMT1
CCAR1
MKI67
IRGQ
ISCU
RABGAP1
TBCC
PPME1
MAP7
PKP2
PHF5A
ZFR
PCM1
LRRC47
RTN3
MAOA
MARCKSL1
HMGN3
CDH2
PRKCSH
FTO
NES
M6PR
GNL2

## Sheet: b
CMS1 vs. CMS2, 3, 4	CMS2 vs. CMS1, 3, 4	CMS3 vs. CMS1, 2, 4	CMS1 vs. CMS1, 3, 4
A2M	ABAT	ABLIM1	ACOT8
ACOT7	ABCB7	AGPAT5	ACTBL2
ACP2	ABCE1	AGR2	ACTR3B
ADAR	ACADSB	AGR3	AGXT2L2
ALCAM	ACOT11	ANKS4B	AHSG
ALDOA	ACOT8	ANXA13	AIF1
ALDOB	ACSL5	AP1M2	ANPEP
ALOX5	ACSS1	AP1S1	ANXA1
ANP32E	ADD1	ARF1	AOC2
API5	ADK	ARF3	APCS
APOL2	ADNP	ARF4	APOC3
ARFGAP3	AGK	ARF6	APOE
ASS1	AHCY	ARFGAP2	APOH
ATP6V1A	AIP	ARHGEF16	ARL6IP1
ATP6V1B2	AK3	ATP2A1	ASPN
ATP6V1E1	ALDH18A1	ATP2A2	ATP5E
ATXN10	AMACR	ATP5J	ATP5J2
AZU1	AP2B1	ATP8B1	BCAT1
BLVRA	ARFGAP1	BAG5	BGN
BPI	ARFGEF1	BAX	CALD1
C1QB	ARMCX3	BCAS1	CAP1
C1R	ATIC	BCAT2	CAP2
C4A	AVL9	BCCIP	CD14
C4B	BAG6	BCL2L15	CD151
C4BPA	BAZ1B	BZW1	CD81
C9	BCKDHA	C14orf2	CFB
CACYBP	BIN1	CAMK2D	CFH
CAMP	BPHL	CC2D1A	CLEC3B
CCT2	BZW2	CCDC124	COL4A1
CCT4	C9orf64	CCDC58	COL4A2
CCT5	CAB39L	CHCHD2	COL4A3
CD44	CAD	CHMP2A	COL4A5
CD74	CARS2	CHMP4A	COL5A1
CDC73	CASK	CKB	COL5A2
CPOX	CCAR1	CLDN3	COPS3
CSK	CCNK	CMAS	CORO7-PAM16
CTSD	CDKN2AIP	CPD	CR2
CTSG	CES1	CSDE1	CRIP2
CUL1	CGN	CXorf26	CRYAB
DDI2	CHD4	DIP2B	CSRP2
DDX3X	CHDH	EEA1	CTDP1
DDX3Y	CHMP4B	EHHADH	CTSZ
DHX15	CKAP5	EIF2S1	CUTA
DNAJC8	CLIC1	EML2	DPEP1
DNMT1	COPS4	ENTPD5	DPT
DTX3L	CPNE1	EPB41L2	DYNLL1
DYSF	CPQ	FCGBP	DYSF
EIF3E	CSE1L	FCHO2	EIF1
EIF4A1	CTNNA1	FUCA2	EIF1B
EIF4A2	CTNND1	GCN1L1	EMILIN1
EIF5A	CTTN	GMDS	FAM160A2
ELANE	CUL4A	GOPC	FAM65A
ENO1	CUL4B	GPA33	FBN3
EZR	DAK	GSR	FERMT2
FGA	DARS2	HBZ	FERMT3
FGB	DDAH2	HDAC1	FHL2
FGG	DDB1	HIP1R	FILIP1L
FKBP4	DDX18	HNRNPH3	FIS1
FKBP5	DDX21	HPCAL1	FMOD
FLII	DDX27	IQGAP3	FTL
FMNL1	DGAT1	ITPR2	GGT5
FSCN1	DHX30	KRAS	GNB4
FTSJ3	DHX9	LGALS4	GNG12
G3BP2	DLAT	LIMA1	H1F0
G6PD	DNAJA3	LRBA	HRG
GBF1	DNAJC2	LSR	HSPG2
GBP1	DPEP1	MAN2A1	IFRD1
GBP2	DTYMK	MIA3	IGFBP7
GEMIN5	EEA1	MIF	ITGA5
GLRX3	EEF1B2	MUC2	ITGAV
GLTP	EIF4H	MVK	ITGB1
GMPS	EIF6	NAPA	ITGB5
GNG5	EPB41L1	NARS	ITGB6
GPI	EPS8L2	NDUFA3	ITIH1
HAT1	ESD	NRAS	KDSR
HIP1R	ESRP1	NUCB1	KRT9
HK3	FARP1	PCNXL2	LAMA4
HLA-DRA	FKBP9	PGAM5	LAMC1
HLA-DRB3	GFM1	PIGR	LIG4
HLA-DRB5	GGH	PKP2	LIMS1
HNRPLL	GLS	POC1B-GALNT4	LOC100134397
HSP90B1	GLYR1	PPP2R5E	LOC100508797
HSPA4L	GOT2	PRPF4	LOC650157
IFI35	GPD1L	PTGFRN	LPA
IK	GTPBP4	PTK2B	LRP1
IKBIP	HEPH	RAB11B	MAPK3
IL4I1	HNRNPU	RAB3B	MCAM
IMPDH2	HNRNPUL2	RAB3D	MFAP5
IPO4	HRSP12	RAN	MFI2
IPO8	HSD17B10	RAP1A	MGLL
ISG15	HSD17B4	RAP1B	MXRA5
ITGAM	HSPA14	REG4	MYL3
ITGB2	HSPA1A	RPL13	MYL6B
KPNB1	HSPA4	RPL5	NID1
LAMTOR1	HSPA9	RPS24	NID2
LDHA	HSPD1	RPS27L	OSTF1
LDHB	HSPH1	RPS6KA3	PARVA
LGALS3BP	HUWE1	S100P	PDLIM7
LMAN2	IARS2	SARNP	PLA2G2A
LOC100507714	IGF2BP1	SELENBP1	PLG
LOC100996708	IGF2BP2	SF3B2	POSTN
LPCAT1	ILF3	SH3BGRL3	PPIH
LRRC40	INTS1	SLC12A2	PRKAR1A
LTF	IPO5	SNRPA	PRKCA
LYZ	IRF2BP2	SOD1	PXDN
MAGOH	KIAA1217	SRC	PYGM
MAGOHB	KIAA1715	SRI	RPL3L
MANF	KIF2A	SRRT	RTN3
MAP2K1	KLC4	SRSF1	S100A4
MCM2	KPNA3	SRSF2	SEPT15
MCM3	KRT23	SRSF8	SERPINA7
MCM4	KTN1	SRSF9	SERPINF2
MCM5	LARP1	STMN1	SIN3B
MCM6	LARS	STXBP2	SLC39A14
MCM7	LMO7	STXBP3	SNRPG
ME1	LRBA	SULT1B1	SPARC
ME2	LRPPRC	SYNGR2	SPCS2
MKI67	LTBP4	TBCA	SPTBN4
MMP9	LUC7L3	TFF1	SSR3
MNDA	LY75	TFF3	STOM
MRTO4	LYPLAL1	TMSB10	STOML3
MYBBP1A	MAGT1	TMSB4X	SURF4
MYO18A	MAP4	TNKS1BP1	SYTL5
MYO18B	MAPRE1	TPI1	TIMP1
NAP1L1	MARCH5	TPM3	TMED1
NARS	MARS2	TRA2A	TNS1
NASP	MATR3	TSG101	TPM1
NT5DC1	MCCC2	UBQLN1	TPM2
NUDC	MECP2	UFD1L	TPM4
OAS2	MGMT	VIL1	TPT1
OAS3	MIPEP	WBP11	TSPO
OXCT1	MLLT4	YARS2	TXNRD2
P4HA1	MMAA	YES1	UCHL1
P4HB	MNF1	YTHDF2	VASP
PAICS	MRE11A		VTN
PAPSS1	MRPL1		VWA1
PARP1	MRPL11		ZMYM3
PARP10	MRPL13
PARP14	MRPL15
PARP9	MRPL19
PCNA	MRPL22
PFKP	MRPL43
PGD	MRPL46
PGM3	MRPL9
PITPNB	MRPS18B
PKM	MRPS30
PNN	MRPS31
PNP	MRPS7
POLD1	MTCH2
POLD2	MTX2
PPIH	MUT
PPP2CA	NBN
PPP2CB	NDUFAF2
PPP2R1B	NES
PPP4C	NFU1
PPP6R3	NHP2
PRPF40A	NIT2
PRPS1	NNT
PRTN3	NOL6
PSAT1	NOP56
PSIP1	NOP58
PSMB2	NUMA1
PSMB3	NUP153
PSMC4	NUP35
PSMD11	NUP88
PSMD12	NUP93
PSMD3	NUP98
PSMD8	PCK2
PSMD9	PDCD11
PSME2	PDCD4
PZP	PDCD5
RANGAP1	PDHA1
RBBP4	PDHB
RBBP7	PDK3
RDX	PDPR
RETSAT	PES1
RFC2	PGRMC1
RFC4	PIGT
RNF213	PKP3
ROCK1	PLRG1
RPA1	PLXNB2
RPA3	PMPCA
RPL22L1	PMPCB
RPL26L1	PNPT1
RPL35A	POFUT1
RPL9	POLDIP2
S100A10	PPA1
S100A12	PPA2
S100A8	PRDX5
S100A9	PRKDC
SAMD9	PRPF6
SDF4	PTCD3
SERPINB1	PTK7
SERPINB5	PTPRK
SERPINB9	PUS7
SERPINC1	QPRT
SF3A3	RAB3GAP2
SHMT2	RABL6
SKIV2L2	RAD21
SLC25A22	RAD50
SLC4A2	RALY
SNX6	RBM17
SON	RBM28
SPATA5	RHOT2
SPTLC2	ROCK2
SQSTM1	ROMO1
SRRM1	RPS4X
SRSF9	RRP12
SSR1	RRS1
SSRP1	RSL1D1
STAT1	SAFB2
STIP1	SAMM50
SUPT16H	SCRIB
TCEA1	SEPT11
TEX264	SEPT7
THBS1	SEPT8
TMED9	SF3B3
TMEM173	SGPL1
TNC	SLC25A12
TSR1	SLC25A13
TUBG1	SLC25A20
TXNDC17	SMC1A
TXNL1	SNRPA1
TXNRD1	SNX12
TYMP	SORL1
UBE2L6	SPAG9
USP14	SPTAN1
VAC14	SPTBN1
VAMP8	SRC
VAPA	SSB
VPS4A	SSBP1
VPS4B	SSH3
VRK1	STAU1
WARS	STRN
XPNPEP1	SUCLA2
YARS	SUCLG1
	SUCLG2
	SUPV3L1
	TARS2
	TBC1D15
	TBL3
	TFAM
	TH1L
	THEM6
	TOMM34
	TOMM70A
	TOP2A
	TOP2B
	TP53BP1
	TPD52L2
	TPP2
	TRMT10C
	TRMT112
	TSTD1
	TUBA1C
	TUBA4A
	TUBB4A
	TUBB8
	UBA1
	UBA2
	UBR5
	UCHL3
	USP7
	USP9X
	UTP14A
	VAPB
	VDAC1
	VDAC2
	VDAC3
	VWA8
	WASL
	WDR12
	WDR5
	WHSC2
	XPOT
	XRCC5
	XRN2
	YTHDF3
	YWHAB
	YWHAQ
	YWHAZ
	ZAK
	ZC3H15
	ZC3HAV1
