# Supplementary material for: Identification of Pharmacologically Tractable Protein Complexes in Cancer Using the R-Based Network Clustering and Visualization Program MCODER
Source: Biomed Res Int. 2017 Jun 13;2017:1016305. doi: 10.1155/2017/1016305 (PMC5485287; doi:10.1155/2017/1016305)
Supplement: Supplementary file 1 — Supplementary Data 1: List of differentially expressed proteins in each of the molecular subtypes of HGS-OvCa and CRC. Supplementary Data 2: Identified submodules for each of the molecular subtypes of HGS-OvCa and CRC. [file 1016305.f1.zip › Supplementary Data 2.xlsx]

## Sheet: README
Supplementary Data 2. Identified submodules for each of the molecular subtypes of HGS-OvCa and CRC.
(a) Identified submodules for each of the molecular subtypes of HGS-OvCa.
(b) DGI database-annotation of the subclusters for HGS-OvCa.
(c) Identified submodules for each of the molecular subtypes of CRC.
(d) DGI database-annotation of the subclusters for CRC.

## Sheet: a
# Overexpressed in Immunoreactive subtype
MCODE submodule 1 (ISG15 complex)	B2M	CD44	GBP1	GBP2	HLA-A	HLA-B	HLA-C	HLA-DRB1	HLA-DRB5	ICAM1	IFI30	IFI35	IFIT1	IFIT2	IFIT3	ISG15	MX1	MX2	OAS1	OAS2	OAS3	SP100
MCODE submodule 2	PSMA3	PSMA5	PSMA7	PSMB10	PSMB8	PSMB9	PSME1	PSME2
MCODE submodule 3	FCER1G	GRB2	HCLS1	INPP5D	NCK1
MCODE submodule 4	CAPZA1	CAPZB	FAM21A	KIAA0196
MCODE submodule 5	SRP19	SRP54	SRP68	SRP72
MCODE submodule 6 (STAT3 complex)	CD14	EIF2AK2	FGR	ITGAM	PLCG2	RAC1	STAT3	VAV1
MCODE submodule 7	CASP1	CASP4	PYCARD
MCODE submodule 8	DTX3L	PARP14	PARP9
# Overexpressed in Differentiated subtype
MCODE submodule 1	ATP5A1	ATP5B	ATP5C1	ATP5D	ATP5L	ATP5O
MCODE submodule 2	COX4I1	COX5B	COX6B1	CYCS	UQCRC1	UQCRC2
MCODE submodule 3	ATP12A	ATP1A1	ATP1A2	ATP1A3	ATP1A4
MCODE submodule 4	MPHOSPH10	NOP56	NOP58	RSL1D1	UTP15
MCODE submodule 5	BCKDHA	BCKDHB	DBT	DLAT	PDHA1	PDHB	PDHX
MCODE submodule 6	FBL	GAR1	NHP2
MCODE submodule 7	HSPA4	PARK7	SOD1
MCODE submodule 8	SDHA	SDHB	SDHC
MCODE submodule 9	SLC25A31	SLC25A4	SLC25A5	VDAC2	VDAC3
# Overexpressed in Mesenchymal subtype
MCODE submodule 1	ACTA2	ACTG2	CALD1	ITGA1	ITGB5	MYH11	MYL12B	MYL6	MYL9	SORBS1	SORBS3	TLN1	TPM1	TPM2	TPM3	TPM4	VCL
MCODE submodule 2	AP2A1	AP2M1	AP2S1	ARCN1	COPA	COPB1	COPB2	COPE	COPG1	SEC24D	SEC31A	TMED7
MCODE submodule 3 (Integrin-collagen complex)	ACTA1	COL11A1	COL12A1	COL1A1	COL1A2	COL2A1	COL3A1	COL5A1	COL5A2	COL6A3	COL8A1	ITGA5	ITGAV	ITGB1	TNS1	ZYX
MCODE submodule 4	ACTB	ACTN1	ACTN2	ACTN4	CD44	FN1	MYH10	MYH14	MYH9	RAC1
MCODE submodule 5	AP1B1	AP2A2	CLTB	CLTC	EHD2	FERMT3	RAP1A	RAP1B	SH3GL1	SH3PXD2B	SVIL	VCAM1
MCODE submodule 6	F13A1	PROS1	SPARC
MCODE submodule 7	ACTR2	ARHGEF6	ARPC1B	ARPC2	ARPC4	ARPC5	CAP1	CAP2	CAPZA2	GIT2	ILK	MYO1C	NCK2
MCODE submodule 8	EFEMP1	EFEMP2	MFAP2
MCODE submodule 9	DCN	GPC4	GPC6
MCODE submodule 10	ACTBL2	ACTR3	ACTR3B	CAPZB	GMFG
MCODE submodule 11	C1QA	C1QB	C1QC	C1S
MCODE submodule 12	FBLN1	FBLN2	VCAN
MCODE submodule 13	ANXA2	CTSB	S100A10
MCODE submodule 14	GPX7	GPX8	P4HB
MCODE submodule 15	INA	NEFH	NEFM	PRPH
MCODE submodule 16	SEC61A1	SEC61A2	SEC61B
MCODE submodule 17	STX12	STX7	VPS18
MCODE submodule 18	SEPT11	SEPT4	SEPT6	SEPT7	SEPT8
# Overexpressed in Proliferative subtype
MCODE submodule 1	ALYREF	CCAR1	CD2BP2	CPSF2	CPSF3	CPSF7	DDX23	DHX9	EFTUD2	FUS	HNRNPA0	HNRNPA1	HNRNPA2B1	HNRNPD	HNRNPH1	HNRNPK	HNRNPL	HNRNPM	HNRNPR	HNRNPU	HNRNPUL1	NCBP1	NUDT21	PABPN1	PCBP2	PHF5A	POLR2B	PRPF4	PRPF6	PRPF8	PTBP1	RBMX	SF3A3	SF3B2	SF3B3	SF3B5	SF3B6	SNRNP200	SNRPA	SNRPA1	SNRPB2	SRSF1	SRSF2	SRSF4	SRSF5	SRSF6	SRSF7	SRSF9	U2AF1
MCODE submodule 2	AAAS	NUP107	NUP133	NUP160	NUP205	NUP210	NUP35	NUP37	NUP93	NXF1	RANBP2	TPR
MCODE submodule 3 (CDK2-proteasome-XPO1 complex)	BUB3	CDK2	CKAP5	CUL1	CUL3	NUDC	PDS5A	PDS5B	PSMB5	PSMB6	PSMB7	PSMC1	PSMC2	PSMC3	PSMC5	PSMD1	PSMD11	PSMD14	PSMD2	PSMD6	RCC2	SKP1	SMC3	STAG2	XPO1
MCODE submodule 4	CBX5	CHD3	CHD4	CHD5	CTR9	GATAD2A	H3F3B	HDAC1	HDAC2	IKBKAP	MCM2	MCM3	MCM4	MCM5	MCM6	MCM7	MTA1	MTA2	MTA3	NELFA	NELFB	NELFE	ORC3	PRMT5	RBBP4	RBBP7	RPA1	RPA2	RPA3	RTF1	SIN3A	TCEA2	WDR77
MCODE submodule 5 (Tubulin complex)	CCT4	TUBA1B	TUBA1C	TUBA4A	TUBB2A	TUBB2B	TUBB4A	TUBB4B	TUBB6
MCODE submodule 6	CDC73	HSP90AA1	MSH2	MSH6	PCM1	PCNA	PRKACA	PRKDC	RFC3	RFC4	RFC5	SMARCA5	SUPT16H	SUPT5H	TCEA1	TCEB1	UBXN7	XRCC5	XRCC6
MCODE submodule 7	ARID1A	DPF2	SMARCC1	SMARCC2	SMARCD1
MCODE submodule 8	LIG3	PARP1	POLB
MCODE submodule 9	CBX1	CBX3	CTBP2	EHMT2	MECOM
MCODE submodule 10	LUC7L	LUC7L3	PRPF40A	RBM25
MCODE submodule 11	NONO	SMARCA2	SMARCB1
MCODE submodule 12	AGRN	LAMA5	LAMB2	LAMC1	PAK4
MCODE submodule 13	DNAJB6	FKBP4	HSP90AB1
MCODE submodule 14	SCAF4	TIA1	TIAL1
MCODE submodule 15	OTUB1	UBE2N	UBE2V2
MCODE submodule 16	GSK3A	GSK3B	NAP1L1

## Sheet: b
Subtype label	Protein	MCODE submodule number	Druggable gene	DGI interaction	DGI interaction: Drug name and interaction type
Immunoreactive	B2M	1	FALSE	TRUE	N-FORMYLMETHIONINE; n/a | 3-INDOLEBUTYRIC ACID; n/a
Immunoreactive	CD44	1	FALSE	TRUE	HYALURONAN; n/a
Immunoreactive	GBP1	1	FALSE	FALSE
Immunoreactive	GBP2	1	FALSE	FALSE
Immunoreactive	HLA-A	1	FALSE	TRUE	CARBAMAZEPINE; n/a | 3-INDOLEBUTYRIC ACID; n/a
Immunoreactive	HLA-B	1	FALSE	TRUE	ABACAVIR; n/a | CARBAMAZEPINE; n/a | PHENYTOIN; n/a | N-FORMYLMETHIONINE; n/a
Immunoreactive	HLA-C	1	FALSE	FALSE
Immunoreactive	HLA-DRB1	1	FALSE	TRUE	GLATIRAMER ACETATE; binder & binder
Immunoreactive	HLA-DRB5	1	FALSE	TRUE	1D09C3; n/a
Immunoreactive	ICAM1	1	FALSE	TRUE	ALICAFORSEN; antisense & n/a | HYALURONAN; n/a | NATALIZUMAB; n/a | COXSACKIEVIRUS TYPE A21; n/a | SAR 1118; n/a | BI-505; n/a
Immunoreactive	IFI30	1	FALSE	FALSE
Immunoreactive	IFI35	1	FALSE	FALSE
Immunoreactive	IFIT1	1	FALSE	TRUE	RIBAVIRIN; n/a | PEGINTERFERON ALFA-2B; n/a
Immunoreactive	IFIT2	1	FALSE	FALSE
Immunoreactive	IFIT3	1	FALSE	FALSE
Immunoreactive	ISG15	1	FALSE	TRUE	IRINOTECAN; inhibitor & inhibitor
Immunoreactive	MX1	1	FALSE	FALSE
Immunoreactive	MX2	1	FALSE	FALSE
Immunoreactive	OAS1	1	FALSE	TRUE	CYSTEINE-S-ACETAMIDE; n/a
Immunoreactive	OAS2	1	FALSE	FALSE
Immunoreactive	OAS3	1	FALSE	FALSE
Immunoreactive	SP100	1	FALSE	FALSE
Immunoreactive	PSMA3	2	TRUE	TRUE	BORTEZOMIB; other/unknown | CARFILZOMIB; other/unknown | (3AR,6R,6AS)-6-((S)-((S)-CYCLOHEX-2-ENYL)(HYDROXY)METHYL)-6A-METHYL-4-OXO-HEXAHYDRO-2H-FURO[3,2-C]PYRROLE-6-CARBALDEHYDE; n/a | N-[(1R)-1-(DIHYDROXYBORYL)-3-METHYLBUTYL]-N-(PYRAZIN-2-YLCARBONYL)-L-PHENYLALANINAMIDE; n/a
Immunoreactive	PSMA5	2	TRUE	TRUE	CARFILZOMIB; other/unknown | BORTEZOMIB; other/unknown | (3AR,6R,6AS)-6-((S)-((S)-CYCLOHEX-2-ENYL)(HYDROXY)METHYL)-6A-METHYL-4-OXO-HEXAHYDRO-2H-FURO[3,2-C]PYRROLE-6-CARBALDEHYDE; n/a | N-[(1R)-1-(DIHYDROXYBORYL)-3-METHYLBUTYL]-N-(PYRAZIN-2-YLCARBONYL)-L-PHENYLALANINAMIDE; n/a
Immunoreactive	PSMA7	2	TRUE	TRUE	2-ACETYLAMINO-4-METHYL-PENTANOIC ACID [1-(1-FORMYL-PENTYLCARBAMOYL)-3-METHYL-BUTYL]-AMIDE; n/a | (3AR,6R,6AS)-6-((S)-((S)-CYCLOHEX-2-ENYL)(HYDROXY)METHYL)-6A-METHYL-4-OXO-HEXAHYDRO-2H-FURO[3,2-C]PYRROLE-6-CARBALDEHYDE; n/a | N-[(1R)-1-(DIHYDROXYBORYL)-3-METHYLBUTYL]-N-(PYRAZIN-2-YLCARBONYL)-L-PHENYLALANINAMIDE; n/a | BORTEZOMIB; other/unknown | CARFILZOMIB; other/unknown
Immunoreactive	PSMB10	2	TRUE	TRUE	CARFILZOMIB; other/unknown | BORTEZOMIB; other/unknown
Immunoreactive	PSMB8	2	TRUE	TRUE	BORTEZOMIB; other/unknown | CARFILZOMIB; other/unknown
Immunoreactive	PSMB9	2	TRUE	TRUE	CARFILZOMIB; other/unknown | BORTEZOMIB; other/unknown
Immunoreactive	PSME1	2	FALSE	TRUE	BORTEZOMIB; other/unknown | CARFILZOMIB; other/unknown
Immunoreactive	PSME2	2	FALSE	TRUE	CARFILZOMIB; other/unknown | BORTEZOMIB; other/unknown
Immunoreactive	FCER1G	3	FALSE	TRUE	BENZYLPENICILLOYL POLYLYSINE; agonist & binder & n/a | R112; n/a
Immunoreactive	GRB2	3	FALSE	TRUE	4-[(10S,14S,18S)-18-(2-AMINO-2-OXOETHYL)-14-(1-NAPHTHYLMETHYL)-8,17,20-TRIOXO-7,16,19-TRIAZASPIRO[5.14]ICOS-11-EN-10-YL]BENZYLPHOSPHONIC ACID; n/a | PEGADEMASE BOVINE; binder | LIPOSOMAL GRB-2; n/a
Immunoreactive	HCLS1	3	FALSE	FALSE
Immunoreactive	INPP5D	3	TRUE	FALSE
Immunoreactive	NCK1	3	FALSE	FALSE
Immunoreactive	CAPZA1	4	FALSE	FALSE
Immunoreactive	CAPZB	4	FALSE	FALSE
Immunoreactive	FAM21A	4	FALSE	FALSE
Immunoreactive	KIAA0196	4	FALSE	FALSE
Immunoreactive	SRP19	5	FALSE	FALSE
Immunoreactive	SRP54	5	FALSE	FALSE
Immunoreactive	SRP68	5	FALSE	FALSE
Immunoreactive	SRP72	5	FALSE	FALSE
Immunoreactive	CD14	6	FALSE	TRUE	FLUTICASONE PROPIONATE; n/a | IC14; n/a
Immunoreactive	EIF2AK2	6	TRUE	TRUE	PKR INHIBITOR; n/a | CDK2 INHIBITOR IV; n/a | INDIRUBIN DERIVATIVE E804; n/a
Immunoreactive	FGR	6	TRUE	FALSE
Immunoreactive	ITGAM	6	TRUE	FALSE
Immunoreactive	PLCG2	6	TRUE	FALSE
Immunoreactive	RAC1	6	FALSE	TRUE	GUANOSINE-5'-DIPHOSPHATE; n/a
Immunoreactive	STAT3	6	FALSE	TRUE	ISIS-STAT3; antisense | RTA 402; inhibitor | ACITRETIN; inhibitor | ATIPRIMOD; inhibitor | OPB-51602; n/a | INTERFERONS; n/a
Immunoreactive	VAV1	6	FALSE	FALSE
Immunoreactive	CASP1	7	TRUE	TRUE	Z-YVAD-FMK; n/a | PRALNACASAN; n/a | 3-{6-[(8-HYDROXY-QUINOLINE-2-CARBONYL)-AMINO]-2-THIOPHEN-2-YL-HEXANOYLAMINO}-4-OXO-BUTYRI ACID; n/a | MINOCYCLINE; negative modulator | 3-[2-(2-BENZYLOXYCARBONYLAMINO-3-METHYL-BUTYRYLAMINO)-PROPIONYLAMINO]-4-OXO-PENTANOIC ACID; n/a | 1-METHYL-3-TRIFLUOROMETHYL-1H-THIENO[2,3-C]PYRAZOLE-5-CARBOXYLIC ACID (2-MERCAPTO-ETHYL)-AMIDE; n/a | VX-765; n/a
Immunoreactive	CASP4	7	TRUE	FALSE
Immunoreactive	PYCARD	7	TRUE	FALSE
Immunoreactive	DTX3L	8	FALSE	FALSE
Immunoreactive	PARP14	8	TRUE	FALSE
Immunoreactive	PARP9	8	TRUE	FALSE
Differentiated	ATP5A1	1	FALSE	TRUE	PICEATANNOL; n/a | 1-ACETYL-2-CARBOXYPIPERIDINE; n/a | N1-(2-AMINO-4-METHYLPENTYL)OCTAHYDRO-PYRROLO[1,2-A] PYRIMIDINE; n/a | AUROVERTIN B; n/a | QUERCETIN; n/a
Differentiated	ATP5B	1	FALSE	TRUE	N1-(2-AMINO-4-METHYLPENTYL)OCTAHYDRO-PYRROLO[1,2-A] PYRIMIDINE; n/a | QUERCETIN; n/a | AUROVERTIN B; n/a | 1-ACETYL-2-CARBOXYPIPERIDINE; n/a | PICEATANNOL; n/a
Differentiated	ATP5C1	1	FALSE	TRUE	QUERCETIN; n/a | N1-(2-AMINO-4-METHYLPENTYL)OCTAHYDRO-PYRROLO[1,2-A] PYRIMIDINE; n/a | AUROVERTIN B; n/a | 1-ACETYL-2-CARBOXYPIPERIDINE; n/a | PICEATANNOL; n/a
Differentiated	ATP5D	1	FALSE	TRUE	ENFLURANE; other/unknown & n/a | SEVOFLURANE; other/unknown & n/a | HALOTHANE; other/unknown & n/a | METHOXYFLURANE; other/unknown & n/a | ISOFLURANE; other/unknown | DESFLURANE; other/unknown & n/a
Differentiated	ATP5L	1	FALSE	FALSE
Differentiated	ATP5O	1	FALSE	FALSE
Differentiated	COX4I1	2	FALSE	TRUE	N-FORMYLMETHIONINE; n/a | CHOLIC ACID; n/a
Differentiated	COX5B	2	FALSE	TRUE	N-FORMYLMETHIONINE; n/a | CHOLIC ACID; n/a
Differentiated	COX6B1	2	FALSE	TRUE	CHOLIC ACID; n/a | N-FORMYLMETHIONINE; n/a
Differentiated	CYCS	2	FALSE	TRUE	HEME; n/a | HEME C; n/a | MINOCYCLINE; negative modulator | PROTOPORPHYRIN IX CONTAINING CO; n/a | PROTOPORPHYRIN IX CONTAINING ZN; n/a | N-TRIMETHYLLYSINE; n/a | ZINC SUBSTITUTED HEME C; n/a
Differentiated	UQCRC1	2	TRUE	TRUE	UBIQUINONE-2; n/a | 5-N-UNDECYL-6-HYDROXY-4,7-DIOXOBENZOTHIAZOLE; n/a | 2-HEXYLOXY-6-HYDROXYMETHYL-TETRAHYDRO-PYRAN-3,4,5-TRIOL; n/a | FAMOXADONE; n/a | METHYL (2Z)-2-(2-{[6-(2-CYANOPHENOXY)PYRIMIDIN-4-YL]OXY}PHENYL)-3-METHOXYACRYLATE; n/a | METHYL (2Z)-3-METHOXY-2-{2-[(E)-2-PHENYLVINYL]PHENYL}ACRYLATE; n/a | (5S)-3-ANILINO-5-(2,4-DIFLUOROPHENYL)-5-METHYL-1,3-OXAZOLIDINE-2,4-DIONE; n/a | 2-NONYL-…
Differentiated	UQCRC2	2	TRUE	TRUE	UBIQUINONE-2; n/a | METHYL (2Z)-3-METHOXY-2-{2-[(E)-2-PHENYLVINYL]PHENYL}ACRYLATE; n/a | METHYL (2Z)-2-(2-{[6-(2-CYANOPHENOXY)PYRIMIDIN-4-YL]OXY}PHENYL)-3-METHOXYACRYLATE; n/a | 2-HEXYLOXY-6-HYDROXYMETHYL-TETRAHYDRO-PYRAN-3,4,5-TRIOL; n/a | (5S)-3-ANILINO-5-(2,4-DIFLUOROPHENYL)-5-METHYL-1,3-OXAZOLIDINE-2,4-DIONE; n/a | 5-N-UNDECYL-6-HYDROXY-4,7-DIOXOBENZOTHIAZOLE; n/a | 2-NONYL-4-HYDROXYQUINOLINE…
Differentiated	ATP12A	3	TRUE	FALSE
Differentiated	ATP1A1	3	TRUE	TRUE	OUABAIN; inhibitor & binder & n/a | DESLANOSIDE; inhibitor & binder & n/a | CHLOROPROCAINE; blocker | ACETYLDIGITOXIN; inhibitor & n/a | DIGITOXIN; inhibitor & n/a | BEPRIDIL; inhibitor & n/a | BRETYLIUM; inhibitor | ETHACRYNIC ACID; inhibitor | TRICHLORMETHIAZIDE; inhibitor | LUMEFANTRINE; binder | ALUMINIUM; binder & binder | ALMITRINE; binder & n/a | ARTEMETHER; binder | CICLOPIROX; binder | D…
Differentiated	ATP1A2	3	TRUE	FALSE
Differentiated	ATP1A3	3	TRUE	FALSE
Differentiated	ATP1A4	3	TRUE	FALSE
Differentiated	MPHOSPH10	4	FALSE	FALSE
Differentiated	NOP56	4	FALSE	FALSE
Differentiated	NOP58	4	FALSE	FALSE
Differentiated	RSL1D1	4	FALSE	FALSE
Differentiated	UTP15	4	FALSE	FALSE
Differentiated	BCKDHA	5	FALSE	FALSE
Differentiated	BCKDHB	5	FALSE	FALSE
Differentiated	DBT	5	FALSE	FALSE
Differentiated	DLAT	5	FALSE	TRUE	NADH; n/a | RADICICOL; n/a | DIHYDROLIPOIC ACID; n/a
Differentiated	PDHA1	5	FALSE	TRUE	CPI-613; n/a | NADH; n/a
Differentiated	PDHB	5	FALSE	TRUE	PYRUVIC ACID; n/a | NADH; n/a | DEXLIPOTAM; n/a | CPI-613; n/a
Differentiated	PDHX	5	FALSE	FALSE
Differentiated	FBL	6	FALSE	FALSE
Differentiated	GAR1	6	FALSE	FALSE
Differentiated	NHP2	6	FALSE	FALSE
Differentiated	HSPA4	7	FALSE	FALSE
Differentiated	PARK7	7	TRUE	TRUE	DOUBLE OXIDIZED CYSTEINE; n/a
Differentiated	SOD1	7	TRUE	TRUE	ISIS-SOD1; antisense | S-OXY CYSTEINE; n/a | DOXORUBICIN; n/a | ISIS-SOD1RX; n/a
Differentiated	SDHA	8	FALSE	TRUE	THENOYLTRIFLUOROACETONE; n/a | UBIQUINONE-1; n/a | CARBOXIN; n/a | 2-HEXYLOXY-6-HYDROXYMETHYL-TETRAHYDRO-PYRAN-3,4,5-TRIOL; n/a | SUCCINIC ACID; n/a
Differentiated	SDHB	8	FALSE	TRUE	2-HEXYLOXY-6-HYDROXYMETHYL-TETRAHYDRO-PYRAN-3,4,5-TRIOL; n/a | UBIQUINONE-1; n/a | SUCCINIC ACID; n/a
Differentiated	SDHC	8	FALSE	TRUE	UBIQUINONE-1; n/a | SUCCINIC ACID; n/a | 2-HEXYLOXY-6-HYDROXYMETHYL-TETRAHYDRO-PYRAN-3,4,5-TRIOL; n/a
Differentiated	SLC25A31	9	TRUE	FALSE
Differentiated	SLC25A4	9	TRUE	TRUE	CLODRONATE; inhibitor & n/a | [3-(DODECANOYLAMINO)PROPYL](HYDROXY)DIMETHYLAMMONIUM; n/a | DI-STEAROYL-3-SN-PHOSPHATIDYLCHOLINE; n/a | CARBOXYATRACTYLOSIDE; n/a | CARDIOLIPIN; n/a | ADENOSINE TRIPHOSPHATE; n/a | BONGKREK ACID; n/a
Differentiated	SLC25A5	9	TRUE	TRUE	CLODRONATE; inhibitor & n/a
Differentiated	VDAC2	9	FALSE	TRUE	DIHYDROXYALUMINIUM; inhibitor | PRLX 93936; activator | OLESOXIME; n/a
Differentiated	VDAC3	9	FALSE	TRUE	DIHYDROXYALUMINIUM; inhibitor | PRLX 93936; activator | OLESOXIME; n/a
Mesenchymal	ACTA2	1	FALSE	FALSE
Mesenchymal	ACTG2	1	FALSE	FALSE
Mesenchymal	CALD1	1	FALSE	FALSE
Mesenchymal	ITGA1	1	TRUE	TRUE	SAN-300; n/a
Mesenchymal	ITGB5	1	TRUE	TRUE	CILENGITIDE; n/a | GLPG0187; n/a | CNTO-95; n/a
Mesenchymal	MYH11	1	FALSE	TRUE	ADENOSINE-5'-DIPHOSPHATE; n/a | TETRAFLUOROALUMINATE ION; n/a
Mesenchymal	MYL12B	1	FALSE	FALSE
Mesenchymal	MYL6	1	FALSE	FALSE
Mesenchymal	MYL9	1	FALSE	FALSE
Mesenchymal	SORBS1	1	FALSE	FALSE
Mesenchymal	SORBS3	1	FALSE	FALSE
Mesenchymal	TLN1	1	FALSE	FALSE
Mesenchymal	TPM1	1	FALSE	FALSE
Mesenchymal	TPM2	1	FALSE	FALSE
Mesenchymal	TPM3	1	FALSE	FALSE
Mesenchymal	TPM4	1	FALSE	FALSE
Mesenchymal	VCL	1	FALSE	FALSE
Mesenchymal	AP2A1	2	FALSE	FALSE
Mesenchymal	AP2M1	2	FALSE	FALSE
Mesenchymal	AP2S1	2	FALSE	FALSE
Mesenchymal	ARCN1	2	FALSE	FALSE
Mesenchymal	COPA	2	FALSE	FALSE
Mesenchymal	COPB1	2	FALSE	FALSE
Mesenchymal	COPB2	2	FALSE	FALSE
Mesenchymal	COPE	2	FALSE	FALSE
Mesenchymal	COPG1	2	FALSE	TRUE	S-(DIMETHYLARSENIC)CYSTEINE; n/a
Mesenchymal	SEC24D	2	FALSE	FALSE
Mesenchymal	SEC31A	2	FALSE	FALSE
Mesenchymal	TMED7	2	FALSE	FALSE
Mesenchymal	ACTA1	3	FALSE	TRUE	LATRUNCULIN A; inhibitor | REIDISPONGIOLIDE A; n/a | ULAPUALIDE A; n/a | TMR; n/a | 4-METHYL-HISTIDINE; n/a | ADENOSINE-5'-DIPHOSPHATE; n/a | SUCROSE; n/a | PHOSPHOAMINOPHOSPHONIC ACID-ADENYLATE ESTER; n/a | APLYRONINE A; n/a | SPHINXOLIDE B; n/a | JASPISAMIDE A; n/a | KABIRAMIDE C; n/a | LATRUNCULIN B; n/a | REIDISPONGIOLIDE C; n/a | THYMOSIN BETA-4; n/a
Mesenchymal	COL11A1	3	FALSE	FALSE
Mesenchymal	COL12A1	3	TRUE	FALSE
Mesenchymal	COL1A1	3	FALSE	TRUE	ETIDRONIC ACID; n/a | ZOLEDRONATE; n/a | SOMATROPIN RECOMBINANT; n/a | PAMIDRONATE; n/a | COLLAGENASE CLOSTRIDIUM HISTOLYTICUM; n/a | COLLAGENASE; n/a
Mesenchymal	COL1A2	3	FALSE	TRUE	COLLAGENASE; n/a | COLLAGENASE CLOSTRIDIUM HISTOLYTICUM; n/a
Mesenchymal	COL2A1	3	FALSE	TRUE	COLLAGENASE CLOSTRIDIUM HISTOLYTICUM; n/a | COLLAGENASE; n/a
Mesenchymal	COL3A1	3	FALSE	TRUE	COLLAGENASE CLOSTRIDIUM HISTOLYTICUM; n/a | COLLAGENASE; n/a
Mesenchymal	COL5A1	3	FALSE	FALSE
Mesenchymal	COL5A2	3	FALSE	FALSE
Mesenchymal	COL6A3	3	TRUE	FALSE
Mesenchymal	COL8A1	3	FALSE	FALSE
Mesenchymal	ITGA5	3	TRUE	TRUE	JSM 6427; antagonist & n/a | PF-04605412; antibody | VOLOCIXIMAB; antibody | VITAXIN; antibody | F200; n/a | CILENGITIDE; n/a | GLPG0187; n/a
Mesenchymal	ITGAV	3	TRUE	TRUE	L-000845704; antagonist | ANTITHYMOCYTE GLOBULIN; n/a | VOLOCIXIMAB; n/a | CNTO-95; n/a | CILENGITIDE; n/a | GLPG0187; n/a
Mesenchymal	ITGB1	3	TRUE	TRUE	VOLOCIXIMAB; antibody & n/a | JSM 6427; antagonist & n/a | R411; antagonist | VITAXIN; antibody | PF-04605412; antibody | FIRATEGRAST; n/a | ATL1102; n/a | ANTITHYMOCYTE GLOBULIN; n/a | SAN-300; n/a | F200; n/a | R1295; n/a | GLPG0187; n/a
Mesenchymal	TNS1	3	TRUE	FALSE
Mesenchymal	ZYX	3	FALSE	FALSE
Mesenchymal	ACTB	4	FALSE	FALSE
Mesenchymal	ACTN1	4	FALSE	FALSE
Mesenchymal	ACTN2	4	FALSE	FALSE
Mesenchymal	ACTN4	4	FALSE	FALSE
Mesenchymal	CD44	4	FALSE	TRUE	HYALURONAN; n/a
Mesenchymal	FN1	4	FALSE	TRUE	1311-L19SIP; antibody | AS1409; binder & n/a
Mesenchymal	MYH10	4	FALSE	FALSE
Mesenchymal	MYH14	4	FALSE	TRUE	PYROPHOSPHATE 2-; n/a | TETRAFLUOROALUMINATE ION; n/a | (3AS)-3A-HYDROXY-5-METHYL-1-PHENYL-1,2,3,3A-TETRAHYDRO-4H-PYRROLO[2,3-B]QUINOLIN-4-ONE; n/a | (3AS)-3A-HYDROXY-1-PHENYL-1,2,3,3A-TETRAHYDRO-4H-PYRROLO[2,3-B]QUINOLIN-4-ONE; n/a | (S)-BLEBBISTATIN; n/a | MANT-ADP; n/a | N-METHYL O-NITROPHENYL AMINOETHYLDIPHOSPHATE BERYLLIUM TRIFLUORIDE; n/a | (3AS)-3A-HYDROXY-7-METHYL-1-PHENYL-1,2,3,3A-TETRAH…
Mesenchymal	MYH9	4	FALSE	FALSE
Mesenchymal	RAC1	4	FALSE	TRUE	GUANOSINE-5'-DIPHOSPHATE; n/a
Mesenchymal	AP1B1	5	FALSE	FALSE
Mesenchymal	AP2A2	5	FALSE	FALSE
Mesenchymal	CLTB	5	FALSE	FALSE
Mesenchymal	CLTC	5	FALSE	FALSE
Mesenchymal	EHD2	5	FALSE	FALSE
Mesenchymal	FERMT3	5	FALSE	FALSE
Mesenchymal	RAP1A	5	FALSE	FALSE
Mesenchymal	RAP1B	5	FALSE	FALSE
Mesenchymal	SH3GL1	5	FALSE	FALSE
Mesenchymal	SH3PXD2B	5	FALSE	FALSE
Mesenchymal	SVIL	5	FALSE	FALSE
Mesenchymal	VCAM1	5	FALSE	TRUE	CARVEDILOL; inhibitor | AGI-1067, SUCCINOBUCOL; n/a
Mesenchymal	F13A1	6	TRUE	TRUE	N-ACETYL-SERINE; n/a | 1,2-PROPANEDIOL; n/a
Mesenchymal	PROS1	6	FALSE	TRUE	SODIUM TETRADECYL SULFATE; inhibitor | DROTRECOGIN ALFA; n/a | MENADIONE; activator & n/a
Mesenchymal	SPARC	6	FALSE	TRUE	NAB-PACLITAXEL; n/a
Mesenchymal	ACTR2	7	FALSE	TRUE	N-[2-(2-METHYL-1H-INDOL-3-YL)ETHYL]THIOPHENE-2-CARBOXAMIDE; n/a | (2S)-2-(3-BROMOPHENYL)-3-(5-CHLORO-2-HYDROXYPHENYL)-1,3-THIAZOLIDIN-4-ONE; n/a
Mesenchymal	ARHGEF6	7	FALSE	FALSE
Mesenchymal	ARPC1B	7	FALSE	TRUE	N-[2-(2-METHYL-1H-INDOL-3-YL)ETHYL]THIOPHENE-2-CARBOXAMIDE; n/a | (2S)-2-(3-BROMOPHENYL)-3-(5-CHLORO-2-HYDROXYPHENYL)-1,3-THIAZOLIDIN-4-ONE; n/a
Mesenchymal	ARPC2	7	FALSE	TRUE	N-[2-(2-METHYL-1H-INDOL-3-YL)ETHYL]THIOPHENE-2-CARBOXAMIDE; n/a | (2S)-2-(3-BROMOPHENYL)-3-(5-CHLORO-2-HYDROXYPHENYL)-1,3-THIAZOLIDIN-4-ONE; n/a
Mesenchymal	ARPC4	7	FALSE	TRUE	N-[2-(2-METHYL-1H-INDOL-3-YL)ETHYL]THIOPHENE-2-CARBOXAMIDE; n/a | (2S)-2-(3-BROMOPHENYL)-3-(5-CHLORO-2-HYDROXYPHENYL)-1,3-THIAZOLIDIN-4-ONE; n/a
Mesenchymal	ARPC5	7	FALSE	TRUE	(2S)-2-(3-BROMOPHENYL)-3-(5-CHLORO-2-HYDROXYPHENYL)-1,3-THIAZOLIDIN-4-ONE; n/a | N-[2-(2-METHYL-1H-INDOL-3-YL)ETHYL]THIOPHENE-2-CARBOXAMIDE; n/a
Mesenchymal	CAP1	7	FALSE	FALSE
Mesenchymal	CAP2	7	FALSE	FALSE
Mesenchymal	CAPZA2	7	FALSE	FALSE
Mesenchymal	GIT2	7	FALSE	FALSE
Mesenchymal	ILK	7	TRUE	FALSE
Mesenchymal	MYO1C	7	FALSE	FALSE
Mesenchymal	NCK2	7	FALSE	FALSE
Mesenchymal	EFEMP1	8	FALSE	FALSE
Mesenchymal	EFEMP2	8	FALSE	FALSE
Mesenchymal	MFAP2	8	FALSE	FALSE
Mesenchymal	DCN	9	FALSE	TRUE	TRIS(HYDROXYMETHYL)AMINOMETHANE; n/a
Mesenchymal	GPC4	9	FALSE	FALSE
Mesenchymal	GPC6	9	FALSE	FALSE
Mesenchymal	ACTBL2	10	FALSE	FALSE
Mesenchymal	ACTR3	10	FALSE	TRUE	(2S)-2-(3-BROMOPHENYL)-3-(5-CHLORO-2-HYDROXYPHENYL)-1,3-THIAZOLIDIN-4-ONE; n/a | N-[2-(2-METHYL-1H-INDOL-3-YL)ETHYL]THIOPHENE-2-CARBOXAMIDE; n/a
Mesenchymal	ACTR3B	10	FALSE	FALSE
Mesenchymal	CAPZB	10	FALSE	FALSE
Mesenchymal	GMFG	10	FALSE	FALSE
Mesenchymal	C1QA	11	FALSE	TRUE	BASILIXIMAB; n/a | IBRITUMOMAB; n/a | ABCIXIMAB; n/a | RITUXIMAB; n/a | TOSITUMOMAB; n/a | BEVACIZUMAB; n/a | ETANERCEPT; n/a | ADALIMUMAB; n/a | ALEMTUZUMAB; n/a | EFALIZUMAB; n/a | CETUXIMAB; n/a | DACLIZUMAB; n/a | PALIVIZUMAB; n/a | GEMTUZUMAB OZOGAMICIN; n/a | TRASTUZUMAB; n/a | MUROMONAB; n/a | NATALIZUMAB; n/a | ALEFACEPT; n/a | IMMUNE GLOBULIN; n/a
Mesenchymal	C1QB	11	FALSE	TRUE	ALEFACEPT; n/a | IBRITUMOMAB; n/a | CETUXIMAB; n/a | ALEMTUZUMAB; n/a | ETANERCEPT; n/a | BEVACIZUMAB; n/a | PALIVIZUMAB; n/a | DACLIZUMAB; n/a | RITUXIMAB; n/a | BASILIXIMAB; n/a | TRASTUZUMAB; n/a | NATALIZUMAB; n/a | EFALIZUMAB; n/a | GEMTUZUMAB OZOGAMICIN; n/a | ABCIXIMAB; n/a | TOSITUMOMAB; n/a | MUROMONAB; n/a | ADALIMUMAB; n/a
Mesenchymal	C1QC	11	FALSE	TRUE	CETUXIMAB; n/a | ABCIXIMAB; n/a | TRASTUZUMAB; n/a | NATALIZUMAB; n/a | ALEMTUZUMAB; n/a | ADALIMUMAB; n/a | PALIVIZUMAB; n/a | IBRITUMOMAB; n/a | BEVACIZUMAB; n/a | BASILIXIMAB; n/a | TOSITUMOMAB; n/a | ETANERCEPT; n/a | ALEFACEPT; n/a | MUROMONAB; n/a | GEMTUZUMAB OZOGAMICIN; n/a | RITUXIMAB; n/a | EFALIZUMAB; n/a | DACLIZUMAB; n/a
Mesenchymal	C1S	11	TRUE	TRUE	RHUCIN; inhibitor | CINRYZE; inhibitor | C1-INH; inhibitor | TANAPROGET; inhibitor | ROMIPLOSTIM; inhibitor | RECOMBINANT HUMAN C1 INHIBITOR; inhibitor | ABCIXIMAB; n/a | MUROMONAB; n/a | TRASTUZUMAB; n/a | ADALIMUMAB; n/a | CETUXIMAB; n/a | RITUXIMAB; n/a | GEMTUZUMAB OZOGAMICIN; n/a | 2-(2-HYDROXY-1,1-DIHYDROXYMETHYL-ETHYLAMINO)-ETHANESULFONIC ACID; n/a | ETANERCEPT; n/a | IBRITUMOMAB; n/a | BA…
Mesenchymal	FBLN1	12	FALSE	FALSE
Mesenchymal	FBLN2	12	FALSE	FALSE
Mesenchymal	VCAN	12	FALSE	FALSE
Mesenchymal	ANXA2	13	FALSE	TRUE	TENECTEPLASE; n/a
Mesenchymal	CTSB	13	TRUE	TRUE	BENZYL N-({(2S,3S)-3-[(PROPYLAMINO)CARBONYL]OXIRAN-2-YL}CARBONYL)-L-ISOLEUCYL-L-PROLINATE; n/a | N-{[(2S,3S)-3-(ETHOXYCARBONYL)OXIRAN-2-YL]CARBONYL}-L-ISOLEUCYL-L-ISOLEUCINE; n/a | METHYL N-({(2S,3S)-3-[(PROPYLAMINO)CARBONYL]OXIRAN-2-YL}CARBONYL)-L-ISOLEUCYL-L-PROLINATE; n/a | DIPHENYLACETIC ACID; n/a | N-{[(2S,3S)-3-(ETHOXYCARBONYL)OXIRAN-2-YL]CARBONYL}-L-ISOLEUCINE; n/a | N-{[(2S,3S)-3-(ETHOXYC…
Mesenchymal	S100A10	13	FALSE	FALSE
Mesenchymal	GPX7	14	TRUE	TRUE	GLUTATHIONE; cofactor
Mesenchymal	GPX8	14	TRUE	TRUE	GLUTATHIONE; n/a
Mesenchymal	P4HB	14	TRUE	TRUE	RIBOSTAMYCIN; n/a
Mesenchymal	INA	15	FALSE	FALSE
Mesenchymal	NEFH	15	FALSE	FALSE
Mesenchymal	NEFM	15	FALSE	TRUE	ANTIPSYCHOTICS; n/a
Mesenchymal	PRPH	15	FALSE	FALSE
Mesenchymal	SEC61A1	16	FALSE	FALSE
Mesenchymal	SEC61A2	16	FALSE	FALSE
Mesenchymal	SEC61B	16	FALSE	FALSE
Mesenchymal	STX12	17	FALSE	FALSE
Mesenchymal	STX7	17	FALSE	FALSE
Mesenchymal	VPS18	17	FALSE	FALSE
Mesenchymal	SEPT11	18	FALSE	FALSE
Mesenchymal	SEPT4	18	FALSE	FALSE
Mesenchymal	SEPT6	18	FALSE	FALSE
Mesenchymal	SEPT7	18	FALSE	FALSE
Mesenchymal	SEPT8	18	FALSE	FALSE
Proliferative	ALYREF	1	FALSE	FALSE
Proliferative	CCAR1	1	FALSE	FALSE
Proliferative	CD2BP2	1	FALSE	FALSE
Proliferative	CPSF2	1	FALSE	FALSE
Proliferative	CPSF3	1	FALSE	FALSE
Proliferative	CPSF7	1	FALSE	FALSE
Proliferative	DDX23	1	FALSE	FALSE
Proliferative	DHX9	1	FALSE	FALSE
Proliferative	EFTUD2	1	FALSE	FALSE
Proliferative	FUS	1	TRUE	FALSE
Proliferative	HNRNPA0	1	FALSE	FALSE
Proliferative	HNRNPA1	1	FALSE	FALSE
Proliferative	HNRNPA2B1	1	FALSE	FALSE
Proliferative	HNRNPD	1	FALSE	FALSE
Proliferative	HNRNPH1	1	FALSE	FALSE
Proliferative	HNRNPK	1	FALSE	FALSE
Proliferative	HNRNPL	1	FALSE	FALSE
Proliferative	HNRNPM	1	FALSE	FALSE
Proliferative	HNRNPR	1	FALSE	FALSE
Proliferative	HNRNPU	1	TRUE	FALSE
Proliferative	HNRNPUL1	1	TRUE	FALSE
Proliferative	NCBP1	1	FALSE	FALSE
Proliferative	NUDT21	1	FALSE	FALSE
Proliferative	PABPN1	1	FALSE	FALSE
Proliferative	PCBP2	1	FALSE	FALSE
Proliferative	PHF5A	1	FALSE	FALSE
Proliferative	POLR2B	1	FALSE	FALSE
Proliferative	PRPF4	1	FALSE	FALSE
Proliferative	PRPF6	1	FALSE	FALSE
Proliferative	PRPF8	1	FALSE	FALSE
Proliferative	PTBP1	1	FALSE	FALSE
Proliferative	RBMX	1	FALSE	FALSE
Proliferative	SF3A3	1	FALSE	FALSE
Proliferative	SF3B2	1	FALSE	FALSE
Proliferative	SF3B3	1	FALSE	FALSE
Proliferative	SF3B5	1	FALSE	FALSE
Proliferative	SF3B6	1	FALSE	FALSE
Proliferative	SNRNP200	1	FALSE	FALSE
Proliferative	SNRPA	1	FALSE	TRUE	MALONIC ACID; n/a
Proliferative	SNRPA1	1	FALSE	FALSE
Proliferative	SNRPB2	1	FALSE	FALSE
Proliferative	SRSF1	1	FALSE	FALSE
Proliferative	SRSF2	1	FALSE	FALSE
Proliferative	SRSF4	1	FALSE	FALSE
Proliferative	SRSF5	1	FALSE	FALSE
Proliferative	SRSF6	1	FALSE	FALSE
Proliferative	SRSF7	1	FALSE	FALSE
Proliferative	SRSF9	1	FALSE	FALSE
Proliferative	U2AF1	1	FALSE	FALSE
Proliferative	AAAS	2	FALSE	FALSE
Proliferative	NUP107	2	FALSE	FALSE
Proliferative	NUP133	2	FALSE	FALSE
Proliferative	NUP160	2	FALSE	FALSE
Proliferative	NUP205	2	FALSE	FALSE
Proliferative	NUP210	2	FALSE	FALSE
Proliferative	NUP35	2	FALSE	FALSE
Proliferative	NUP37	2	FALSE	FALSE
Proliferative	NUP93	2	FALSE	FALSE
Proliferative	NXF1	2	FALSE	FALSE
Proliferative	RANBP2	2	TRUE	FALSE
Proliferative	TPR	2	FALSE	FALSE
Proliferative	BUB3	3	FALSE	FALSE
Proliferative	CDK2	3	TRUE	TRUE	OLOMOUCINE; inhibitor | HYMENIALDISINE; inhibitor | FLAVOPIRIDOL; inhibitor & inhibitor | INDIRUBIN-3'-MONOXIME; inhibitor | SU9516; inhibitor & n/a | SNS-032; inhibitor & n/a | AT7519; inhibitor & n/a | ALVOCIDIB; inhibitor & n/a | SELICICLIB; inhibitor & n/a | SCH727965; inhibitor | BAY1000394; inhibitor | ZK 304709; inhibitor | AG-024322; inhibitor | R-ROSCOVITINE; inhibitor | SCH 727965; inhi…
Proliferative	CKAP5	3	FALSE	FALSE
Proliferative	CUL1	3	FALSE	FALSE
Proliferative	CUL3	3	FALSE	FALSE
Proliferative	NUDC	3	FALSE	FALSE
Proliferative	PDS5A	3	FALSE	FALSE
Proliferative	PDS5B	3	FALSE	FALSE
Proliferative	PSMB5	3	TRUE	TRUE	BORTEZOMIB; antagonist & other/unknown & n/a | CARFILZOMIB; other/unknown & n/a | N-[(1R)-1-(DIHYDROXYBORYL)-3-METHYLBUTYL]-N-(PYRAZIN-2-YLCARBONYL)-L-PHENYLALANINAMIDE; n/a | (3AR,6R,6AS)-6-((S)-((S)-CYCLOHEX-2-ENYL)(HYDROXY)METHYL)-6A-METHYL-4-OXO-HEXAHYDRO-2H-FURO[3,2-C]PYRROLE-6-CARBALDEHYDE; n/a | OPROZOMIB; n/a | MLN-9708; n/a
Proliferative	PSMB6	3	TRUE	TRUE	N-[(1R)-1-(DIHYDROXYBORYL)-3-METHYLBUTYL]-N-(PYRAZIN-2-YLCARBONYL)-L-PHENYLALANINAMIDE; n/a | (3AR,6R,6AS)-6-((S)-((S)-CYCLOHEX-2-ENYL)(HYDROXY)METHYL)-6A-METHYL-4-OXO-HEXAHYDRO-2H-FURO[3,2-C]PYRROLE-6-CARBALDEHYDE; n/a | BORTEZOMIB; other/unknown | CARFILZOMIB; other/unknown
Proliferative	PSMB7	3	TRUE	TRUE	N-[(1R)-1-(DIHYDROXYBORYL)-3-METHYLBUTYL]-N-(PYRAZIN-2-YLCARBONYL)-L-PHENYLALANINAMIDE; n/a | (3AR,6R,6AS)-6-((S)-((S)-CYCLOHEX-2-ENYL)(HYDROXY)METHYL)-6A-METHYL-4-OXO-HEXAHYDRO-2H-FURO[3,2-C]PYRROLE-6-CARBALDEHYDE; n/a | BORTEZOMIB; other/unknown | CARFILZOMIB; other/unknown
Proliferative	PSMC1	3	TRUE	TRUE	BORTEZOMIB; other/unknown | CARFILZOMIB; other/unknown
Proliferative	PSMC2	3	TRUE	TRUE	BORTEZOMIB; other/unknown & inhibitor | CARFILZOMIB; other/unknown & inhibitor | SALINOSPORAMIDE A; inhibitor | MLN9708; inhibitor
Proliferative	PSMC3	3	FALSE	TRUE	BORTEZOMIB; other/unknown | CARFILZOMIB; other/unknown
Proliferative	PSMC5	3	TRUE	TRUE	BORTEZOMIB; other/unknown | CARFILZOMIB; other/unknown
Proliferative	PSMD1	3	FALSE	TRUE	BORTEZOMIB; inhibitor & other/unknown & n/a | MLN-9708; n/a | OPROZOMIB; n/a | CARFILZOMIB; other/unknown
Proliferative	PSMD11	3	FALSE	TRUE	CARFILZOMIB; other/unknown | BORTEZOMIB; other/unknown
Proliferative	PSMD14	3	TRUE	TRUE	BORTEZOMIB; other/unknown | CARFILZOMIB; other/unknown
Proliferative	PSMD2	3	FALSE	TRUE	BORTEZOMIB; inhibitor & other/unknown & n/a | CARFILZOMIB; other/unknown | MLN-9708; n/a | OPROZOMIB; n/a
Proliferative	PSMD6	3	FALSE	TRUE	CARFILZOMIB; other/unknown | BORTEZOMIB; other/unknown
Proliferative	RCC2	3	FALSE	FALSE
Proliferative	SKP1	3	FALSE	TRUE	(2S)-2-(1H-INDOL-3-YL)PENTANOIC ACID; n/a | NAPHTHALEN-1-YL-ACETIC ACID; n/a | (2S)-8-[(TERT-BUTOXYCARBONYL)AMINO]-2-(1H-INDOL-3-YL)OCTANOIC ACID; n/a | 1H-INDOL-3-YLACETIC ACID; n/a | (2S)-2-(1H-INDOL-3-YL)HEXANOIC ACID; n/a
Proliferative	SMC3	3	FALSE	FALSE
Proliferative	STAG2	3	FALSE	FALSE
Proliferative	XPO1	3	FALSE	FALSE
Proliferative	CBX5	4	FALSE	FALSE
Proliferative	CHD3	4	FALSE	FALSE
Proliferative	CHD4	4	FALSE	FALSE
Proliferative	CHD5	4	FALSE	FALSE
Proliferative	CTR9	4	FALSE	FALSE
Proliferative	GATAD2A	4	FALSE	FALSE
Proliferative	H3F3B	4	FALSE	FALSE
Proliferative	HDAC1	4	FALSE	TRUE	LAQ824; inhibitor | HC-TOXIN; inhibitor | MGCD-0103; inhibitor & n/a | SCRIPTAID; inhibitor & n/a | SNDX-275; inhibitor | SK-7068; inhibitor | ITF2357; inhibitor | MS-275; inhibitor | FFF2; inhibitor | PANOBINOSTAT; inhibitor & n/a | SODIUM BUTYRATE; inhibitor | HDAC-42; inhibitor | RG2833; inhibitor | 4SC-202; inhibitor & n/a | TACEDINALINE; inhibitor | OXAMFLATIN; inhibitor | PDX-101; inhibitor…
Proliferative	HDAC2	4	FALSE	TRUE	VALPROIC ACID; inhibitor | SODIUM PHENYLBUTYRATE; inhibitor | PANOBINOSTAT; inhibitor & n/a | PCI-24781; inhibitor | FK-228; inhibitor | CHR-3996; inhibitor | DACINOSTAT; inhibitor & n/a | GIVINOSTAT; inhibitor & n/a | BELINOSTAT; inhibitor & n/a | ENTINOSTAT; inhibitor & n/a | PIVANEX; inhibitor | VORINOSTAT; inhibitor & n/a | ROMIDEPSIN; inhibitor & n/a | CRA-024781; n/a | MGCD-0103; n/a | RESM…
Proliferative	IKBKAP	4	FALSE	FALSE
Proliferative	MCM2	4	FALSE	FALSE
Proliferative	MCM3	4	FALSE	FALSE
Proliferative	MCM4	4	FALSE	FALSE
Proliferative	MCM5	4	FALSE	FALSE
Proliferative	MCM6	4	FALSE	FALSE
Proliferative	MCM7	4	FALSE	FALSE
Proliferative	MTA1	4	FALSE	FALSE
Proliferative	MTA2	4	FALSE	FALSE
Proliferative	MTA3	4	FALSE	FALSE
Proliferative	NELFA	4	FALSE	FALSE
Proliferative	NELFB	4	FALSE	FALSE
Proliferative	NELFE	4	FALSE	FALSE
Proliferative	ORC3	4	FALSE	FALSE
Proliferative	PRMT5	4	FALSE	FALSE
Proliferative	RBBP4	4	FALSE	FALSE
Proliferative	RBBP7	4	FALSE	FALSE
Proliferative	RPA1	4	FALSE	FALSE
Proliferative	RPA2	4	FALSE	FALSE
Proliferative	RPA3	4	FALSE	FALSE
Proliferative	RTF1	4	FALSE	FALSE
Proliferative	SIN3A	4	FALSE	FALSE
Proliferative	TCEA2	4	FALSE	FALSE
Proliferative	WDR77	4	FALSE	FALSE
Proliferative	CCT4	5	FALSE	FALSE
Proliferative	TUBA1B	5	TRUE	TRUE	2-MERCAPTO-N-[1,2,3,10-TETRAMETHOXY-9-OXO-5,6,7,9-TETRAHYDRO-BENZO[A]HEPTALEN-7-YL]ACETAMIDE; n/a | EPOTHILONE B; n/a | EPOTHILONE D; n/a
Proliferative	TUBA1C	5	TRUE	TRUE	EPOTHILONE B; n/a | 2-MERCAPTO-N-[1,2,3,10-TETRAMETHOXY-9-OXO-5,6,7,9-TETRAHYDRO-BENZO[A]HEPTALEN-7-YL]ACETAMIDE; n/a | EPOTHILONE D; n/a
Proliferative	TUBA4A	5	TRUE	TRUE	PODOFILOX; inhibitor | VINCRISTINE; inhibitor & n/a | CABAZITAXEL; binder & n/a | EPOTHILONE D; n/a | EPOTHILONE B; n/a
Proliferative	TUBB2A	5	TRUE	TRUE	VINORELBINE; n/a | IXABEPILONE; n/a | VINCRISTINE; n/a | VINBLASTINE; n/a
Proliferative	TUBB2B	5	TRUE	TRUE	2-MERCAPTO-N-[1,2,3,10-TETRAMETHOXY-9-OXO-5,6,7,9-TETRAHYDRO-BENZO[A]HEPTALEN-7-YL]ACETAMIDE; n/a
Proliferative	TUBB4A	5	TRUE	FALSE
Proliferative	TUBB4B	5	TRUE	TRUE	MEBENDAZOLE; inhibitor | ALBENDAZOLE; inhibitor | EPOTHILONE D; n/a | EPOTHILONE B; n/a
Proliferative	TUBB6	5	TRUE	FALSE
Proliferative	CDC73	6	FALSE	FALSE
Proliferative	HSP90AA1	6	TRUE	TRUE	CNF1010; inhibitor & n/a | XL888; inhibitor & n/a | AT13387; inhibitor & n/a | GANETESPIB; inhibitor & other/unknown & n/a | SNX-5422; inhibitor & n/a | TANESPIMYCIN; inhibitor & other/unknown & n/a | ALVESPIMYCIN; inhibitor & n/a | RETASPIMYCIN; inhibitor & other/unknown & n/a | IPI-504; inhibitor & n/a | STA-9090; inhibitor & inhibitor | ALVESPIMYCIN HYDROCHLORIDE; inhibitor | AUY922; other/unk…
Proliferative	MSH2	6	FALSE	FALSE
Proliferative	MSH6	6	FALSE	FALSE
Proliferative	PCM1	6	FALSE	FALSE
Proliferative	PCNA	6	FALSE	TRUE	VIT-100; n/a
Proliferative	PRKACA	6	TRUE	TRUE	5-(1,4-DIAZEPAN-1-SULFONYL)ISOQUINOLINE; n/a | (2R)-2-(4-CHLOROPHENYL)-2-PHENYLETHANAMINE; n/a | BALANOL ANALOG 2; n/a | BALANOL; n/a | MYRISTIC ACID; n/a | (R)-TRANS-4-(1-AMINOETHYL)-N-(4-PYRIDYL) CYCLOHEXANECARBOXAMIDE; n/a | N-[2-(METHYLAMINO)ETHYL]-5-ISOQUINOLINESULFONAMIDE; n/a | (1S)-1-(1H-INDOL-3-YLMETHYL)-2-(2-PYRIDIN-4-YL-[1,7]NAPHTYRIDIN-5-YLOXY)-EHYLAMINE; n/a | N-METHYL-1-[4-(9H-PURIN…
Proliferative	PRKDC	6	TRUE	TRUE	DNA-PK INHIBITOR V; n/a | DNA-PK INHIBITOR II; n/a | WORTMANNIN; n/a | SF1126; n/a
Proliferative	RFC3	6	FALSE	FALSE
Proliferative	RFC4	6	FALSE	FALSE
Proliferative	RFC5	6	FALSE	TRUE	ADENOSINE-5'-DIPHOSPHATE; n/a
Proliferative	SMARCA5	6	FALSE	TRUE	BETA-D-GLUCOSE; n/a | 4-DEOXY-ALPHA-D-GLUCOSE; n/a
Proliferative	SUPT16H	6	TRUE	FALSE
Proliferative	SUPT5H	6	FALSE	FALSE
Proliferative	TCEA1	6	FALSE	FALSE
Proliferative	TCEB1	6	FALSE	FALSE
Proliferative	UBXN7	6	FALSE	FALSE
Proliferative	XRCC5	6	FALSE	TRUE	THALIDOMIDE; n/a
Proliferative	XRCC6	6	FALSE	FALSE
Proliferative	ARID1A	7	FALSE	FALSE
Proliferative	DPF2	7	FALSE	FALSE
Proliferative	SMARCC1	7	FALSE	FALSE
Proliferative	SMARCC2	7	FALSE	FALSE
Proliferative	SMARCD1	7	FALSE	FALSE
Proliferative	LIG3	8	FALSE	TRUE	BLEOMYCIN; inhibitor
Proliferative	PARP1	8	TRUE	TRUE	BSI-201; inhibitor | AG140699; inhibitor | OLAPARIB; inhibitor & other/unknown & n/a | AG-14699; inhibitor | INO-1001; inhibitor | KU-0059436; inhibitor | MK-4827; inhibitor & n/a | VELIPARIB; inhibitor & other/unknown & n/a | AG014699; inhibitor | INIPARIB; inhibitor & other/unknown & n/a | MK4827; inhibitor & other/unknown | ABT-888; inhibitor | AZD 2281; inhibitor | NICOTINAMIDE; binder & bind…
Proliferative	POLB	8	FALSE	TRUE	CYTARABINE; inhibitor & n/a | MBO7133 (CYTARABINE PRODRUG); n/a | 2'-DEOXYADENOSINE 5'-TRIPHOSPHATE; n/a | (1S)-1,2,3,4-TETRAHYDRO-BENZO[C]PHENANTHRENE-2,3,4-TRIOL; n/a
Proliferative	CBX1	9	FALSE	FALSE
Proliferative	CBX3	9	FALSE	FALSE
Proliferative	CTBP2	9	FALSE	FALSE
Proliferative	EHMT2	9	FALSE	TRUE	BRD9539; n/a | UNC0638; n/a | UNC0642; n/a | BIX-01294; n/a
Proliferative	MECOM	9	FALSE	FALSE
Proliferative	LUC7L	10	FALSE	FALSE
Proliferative	LUC7L3	10	FALSE	FALSE
Proliferative	PRPF40A	10	FALSE	FALSE
Proliferative	RBM25	10	FALSE	FALSE
Proliferative	NONO	11	FALSE	FALSE
Proliferative	SMARCA2	11	FALSE	FALSE
Proliferative	SMARCB1	11	FALSE	FALSE
Proliferative	AGRN	12	FALSE	FALSE
Proliferative	LAMA5	12	FALSE	FALSE
Proliferative	LAMB2	12	FALSE	FALSE
Proliferative	LAMC1	12	FALSE	FALSE
Proliferative	PAK4	12	TRUE	FALSE
Proliferative	DNAJB6	13	FALSE	FALSE
Proliferative	FKBP4	13	TRUE	FALSE
Proliferative	HSP90AB1	13	TRUE	TRUE	AUY922; inhibitor & other/unknown | METHYL 3-CHLORO-2-{3-[(2,5-DIHYDROXY-4-METHOXYPHENYL)AMINO]-3-OXOPROPYL}-4,6-DIHYDROXYBENZOATE; n/a | 2-(3-AMINO-2,5,6-TRIMETHOXYPHENYL)ETHYL 5-CHLORO-2,4-DIHYDROXYBENZOATE; n/a | 8-(6-BROMO-BENZO[1,3]DIOXOL-5-YLSULFANYL)-9-(3-ISOPROPYLAMINO-PROPYL)-ADENINE; n/a | RADICICOL; n/a | 4-{4-[4-(3-AMINOPROPOXY)PHENYL]-1H-PYRAZOL-5-YL}-6-CHLOROBENZENE-1,3-DIOL; n/a | …
Proliferative	SCAF4	14	FALSE	FALSE
Proliferative	TIA1	14	FALSE	FALSE
Proliferative	TIAL1	14	FALSE	FALSE
Proliferative	OTUB1	15	TRUE	FALSE
Proliferative	UBE2N	15	FALSE	FALSE
Proliferative	UBE2V2	15	FALSE	FALSE
Proliferative	GSK3A	16	TRUE	TRUE	TIDEGLUSIB; n/a | ALOISINE A; n/a | AZD1080; n/a
Proliferative	GSK3B	16	TRUE	TRUE	LITHIUM; inhibitor | ENZASTAURIN; inhibitor | KENPAULLONE; n/a | TIDEGLUSIB; n/a | ISOGRANULATIMIDE; n/a | LI<SUP>+</SUP>; n/a | RGB-286638; n/a | GSK-3BETA INHIBITOR II; n/a | GSK-3BETA INHIBITOR I; n/a | COMPOUND 52 [PMID:9677190]; n/a | CDK/CRK INHIBITOR; n/a | CDK1/5 INHIBITOR; n/a | AZD1080; n/a | ALSTERPAULLONE 2-CYANOETHYL; n/a | ALSTERPAULLONE; n/a | GSK-3BETA INHIBITOR VIII; n/a | GSK-3B…
Proliferative	NAP1L1	16	FALSE	FALSE
Proliferative+Mesenchymal	DYNC1LI2	1	FALSE	FALSE
Proliferative+Mesenchymal	TUBA1B	1	TRUE	TRUE	2-MERCAPTO-N-[1,2,3,10-TETRAMETHOXY-9-OXO-5,6,7,9-TETRAHYDRO-BENZO[A]HEPTALEN-7-YL]ACETAMIDE; n/a | EPOTHILONE B; n/a | EPOTHILONE D; n/a
Proliferative+Mesenchymal	TUBA1C	1	TRUE	TRUE	EPOTHILONE B; n/a | 2-MERCAPTO-N-[1,2,3,10-TETRAMETHOXY-9-OXO-5,6,7,9-TETRAHYDRO-BENZO[A]HEPTALEN-7-YL]ACETAMIDE; n/a | EPOTHILONE D; n/a
Proliferative+Mesenchymal	TUBA4A	1	TRUE	TRUE	PODOFILOX; inhibitor | VINCRISTINE; inhibitor & n/a | CABAZITAXEL; binder & n/a | EPOTHILONE D; n/a | EPOTHILONE B; n/a
Proliferative+Mesenchymal	TUBB2A	1	TRUE	TRUE	VINORELBINE; n/a | IXABEPILONE; n/a | VINCRISTINE; n/a | VINBLASTINE; n/a
Proliferative+Mesenchymal	TUBB2B	1	TRUE	TRUE	2-MERCAPTO-N-[1,2,3,10-TETRAMETHOXY-9-OXO-5,6,7,9-TETRAHYDRO-BENZO[A]HEPTALEN-7-YL]ACETAMIDE; n/a
Proliferative+Mesenchymal	TUBB4A	1	TRUE	FALSE
Proliferative+Mesenchymal	TUBB4B	1	TRUE	TRUE	MEBENDAZOLE; inhibitor | ALBENDAZOLE; inhibitor | EPOTHILONE D; n/a | EPOTHILONE B; n/a
Proliferative+Mesenchymal	TUBB6	1	TRUE	FALSE
Proliferative+Mesenchymal	CUL1	2	FALSE	FALSE
Proliferative+Mesenchymal	CUL3	2	FALSE	FALSE
Proliferative+Mesenchymal	PSMB5	2	TRUE	TRUE	BORTEZOMIB; antagonist & other/unknown & n/a | CARFILZOMIB; other/unknown & n/a | N-[(1R)-1-(DIHYDROXYBORYL)-3-METHYLBUTYL]-N-(PYRAZIN-2-YLCARBONYL)-L-PHENYLALANINAMIDE; n/a | (3AR,6R,6AS)-6-((S)-((S)-CYCLOHEX-2-ENYL)(HYDROXY)METHYL)-6A-METHYL-4-OXO-HEXAHYDRO-2H-FURO[3,2-C]PYRROLE-6-CARBALDEHYDE; n/a | OPROZOMIB; n/a | MLN-9708; n/a
Proliferative+Mesenchymal	PSMB6	2	TRUE	TRUE	N-[(1R)-1-(DIHYDROXYBORYL)-3-METHYLBUTYL]-N-(PYRAZIN-2-YLCARBONYL)-L-PHENYLALANINAMIDE; n/a | (3AR,6R,6AS)-6-((S)-((S)-CYCLOHEX-2-ENYL)(HYDROXY)METHYL)-6A-METHYL-4-OXO-HEXAHYDRO-2H-FURO[3,2-C]PYRROLE-6-CARBALDEHYDE; n/a | BORTEZOMIB; other/unknown | CARFILZOMIB; other/unknown
Proliferative+Mesenchymal	PSMB7	2	TRUE	TRUE	N-[(1R)-1-(DIHYDROXYBORYL)-3-METHYLBUTYL]-N-(PYRAZIN-2-YLCARBONYL)-L-PHENYLALANINAMIDE; n/a | (3AR,6R,6AS)-6-((S)-((S)-CYCLOHEX-2-ENYL)(HYDROXY)METHYL)-6A-METHYL-4-OXO-HEXAHYDRO-2H-FURO[3,2-C]PYRROLE-6-CARBALDEHYDE; n/a | BORTEZOMIB; other/unknown | CARFILZOMIB; other/unknown
Proliferative+Mesenchymal	PSMC1	2	TRUE	TRUE	BORTEZOMIB; other/unknown | CARFILZOMIB; other/unknown
Proliferative+Mesenchymal	PSMD1	2	FALSE	TRUE	BORTEZOMIB; inhibitor & other/unknown & n/a | MLN-9708; n/a | OPROZOMIB; n/a | CARFILZOMIB; other/unknown
Proliferative+Mesenchymal	PSMD13	2	FALSE	FALSE
Proliferative+Mesenchymal	PSMD14	2	TRUE	TRUE	BORTEZOMIB; other/unknown | CARFILZOMIB; other/unknown
Proliferative+Mesenchymal	GPC4	3	FALSE	FALSE
Proliferative+Mesenchymal	GPC6	3	FALSE	FALSE
Proliferative+Mesenchymal	LRP1	3	FALSE	TRUE	TENECTEPLASE; n/a | ANTIHEMOPHILIC FACTOR; modulator | COAGULATION FACTOR IX; n/a
Proliferative+Mesenchymal	MMP14	3	TRUE	TRUE	MARIMASTAT; inhibitor | PRINOMASTAT; vaccine
Proliferative+Mesenchymal	SEPT11	4	FALSE	FALSE
Proliferative+Mesenchymal	SEPT6	4	FALSE	FALSE
Proliferative+Mesenchymal	SEPT7	4	FALSE	FALSE
Proliferative+Mesenchymal	SEPT9	4	FALSE	FALSE
Proliferative+Mesenchymal	ITGB1	5	TRUE	TRUE	VOLOCIXIMAB; antibody & n/a | JSM 6427; antagonist & n/a | R411; antagonist | VITAXIN; antibody | PF-04605412; antibody | FIRATEGRAST; n/a | ATL1102; n/a | ANTITHYMOCYTE GLOBULIN; n/a | SAN-300; n/a | F200; n/a | R1295; n/a | GLPG0187; n/a
Proliferative+Mesenchymal	LAMB1	5	FALSE	FALSE
Proliferative+Mesenchymal	PAK4	5	TRUE	FALSE
Proliferative+Mesenchymal	ACTL6A	6	FALSE	FALSE
Proliferative+Mesenchymal	SMARCB1	6	FALSE	FALSE
Proliferative+Mesenchymal	SMARCD1	6	FALSE	FALSE
Proliferative+Mesenchymal	CPSF2	7	FALSE	FALSE
Proliferative+Mesenchymal	CRNKL1	7	FALSE	FALSE
Proliferative+Mesenchymal	DDX23	7	FALSE	FALSE
Proliferative+Mesenchymal	SNRNP200	7	FALSE	FALSE
Proliferative+Mesenchymal	FBLIM1	8	FALSE	FALSE
Proliferative+Mesenchymal	FERMT1	8	FALSE	FALSE
Proliferative+Mesenchymal	FERMT2	8	FALSE	FALSE
Proliferative+Mesenchymal	GSK3A	9	TRUE	TRUE	TIDEGLUSIB; n/a | ALOISINE A; n/a | AZD1080; n/a
Proliferative+Mesenchymal	GSK3B	9	TRUE	TRUE	LITHIUM; inhibitor | ENZASTAURIN; inhibitor | KENPAULLONE; n/a | TIDEGLUSIB; n/a | ISOGRANULATIMIDE; n/a | LI<SUP>+</SUP>; n/a | RGB-286638; n/a | GSK-3BETA INHIBITOR II; n/a | GSK-3BETA INHIBITOR I; n/a | COMPOUND 52 [PMID:9677190]; n/a | CDK/CRK INHIBITOR; n/a | CDK1/5 INHIBITOR; n/a | AZD1080; n/a | ALSTERPAULLONE 2-CYANOETHYL; n/a | ALSTERPAULLONE; n/a | GSK-3BETA INHIBITOR VIII; n/a | GSK-3B…
Proliferative+Mesenchymal	NAP1L1	9	FALSE	FALSE
Proliferative+Mesenchymal	IGF2BP1	10	FALSE	FALSE
Proliferative+Mesenchymal	KRAS	10	FALSE	FALSE
Proliferative+Mesenchymal	NCAM1	10	FALSE	FALSE
Proliferative+Mesenchymal	NRAS	10	FALSE	FALSE
BRCA-mutation	NDUFA6	1	FALSE	FALSE
BRCA-mutation	NDUFA7	1	FALSE	FALSE
BRCA-mutation	NDUFS1	1	FALSE	FALSE
BRCA-mutation	NDUFS3	1	FALSE	FALSE
BRCA-mutation	NDUFV1	1	FALSE	FALSE
BRCA-mutation	COL12A1	2	TRUE	FALSE
BRCA-mutation	COL14A1	2	FALSE	FALSE
BRCA-mutation	COL6A2	2	FALSE	FALSE
BRCA-mutation	COL6A3	2	TRUE	FALSE
BRCA-mutation	AP2A1	3	FALSE	FALSE
BRCA-mutation	AP2A2	3	FALSE	FALSE
BRCA-mutation	MAPK1	3	FALSE	FALSE
BRCA-mutation	RPS6KA3	3	TRUE	TRUE	AT9283; inhibitor
BRCA-mutation	SHC1	3	FALSE	FALSE
BRCA-mutation	CTNND1	4	FALSE	FALSE
BRCA-mutation	VASP	4	FALSE	FALSE
BRCA-mutation	VCL	4	FALSE	FALSE
BRCA-mutation	CUL4A	5	FALSE	FALSE
BRCA-mutation	CUL4B	5	FALSE	FALSE
BRCA-mutation	DDB1	5	FALSE	FALSE
BRCA-mutation	NF2	5	FALSE	FALSE
BRCA-mutation	LAMB1	6	FALSE	FALSE
BRCA-mutation	LAMC1	6	FALSE	FALSE
BRCA-mutation	PRNP	6	FALSE	FALSE
BRCA-mutation	MRPL15	7	FALSE	FALSE
BRCA-mutation	MRPL19	7	FALSE	FALSE
BRCA-mutation	MRPL49	7	FALSE	FALSE
BRCA-mutation	RPL4	7	FALSE	FALSE

## Sheet: c
# Overexpressed in CMS1 subtype
MCODE submodule 1 (Proteasome complex)	CUL1	PSMB2	PSMC4	PSMD11	PSMD12	PSMD3	PSMD8	PSMD9	PSME2
MCODE submodule 2	MCM2	MCM3	MCM4	MCM5	MCM6	MCM7	RPA1	RPA3	SSRP1
MCODE submodule 3	ADAR	CCT2	CCT4	CCT5	IFI35	IPO4	ISG15	KPNB1	PCNA	POLD1	POLD2	PPP2CA	PPP2CB	PPP4C	RFC4
MCODE submodule 4	CD44	GBP1	HLA-DRB5
MCODE submodule 5	DNAJC8	SF3A3	SRRM1	SRSF9
MCODE submodule 6	FGA	FGB	FGG	ITGAM	ITGB2
MCODE submodule 7	MRTO4	RPL22L1	RPL26L1	RPL35A	RPL9
MCODE submodule 8	GBP2	GMPS	OAS2	OAS3	YARS
MCODE submodule 9	EIF4A1	EIF4A2	UBE2L6
MCODE submodule 10	ATP6V1A	ATP6V1B2	ATP6V1E1
MCODE submodule 11	C4A	C4B	C4BPA
MCODE submodule 12	DTX3L	PARP14	PARP9
MCODE submodule 13 (ROCK1 complex)	EZR	RDX	ROCK1
# Overexpressed in CMS2 subtype
MCODE submodule 1	DDX18	GTPBP4	PES1	RBM28	RSL1D1	WDR12
MCODE submodule 2	CCAR1	DDX27	DHX9	EIF6	HNRNPU	NOP56	NOP58	PDCD11	PRPF6	RRP12	SF3B3	SNRPA1
MCODE submodule 3 (Tubulin complex)	CKAP5	MAPRE1	TUBA1C	TUBA4A	TUBB4A
MCODE submodule 4	COPS4	CUL4A	CUL4B	DDB1
MCODE submodule 5 (SRC complex)	CTNND1	CTTN	EPB41L1	SRC	YWHAB	YWHAQ	YWHAZ
MCODE submodule 6	MRPL1	MRPL13	MRPL15	NUP153	NUP35	NUP88	NUP93	NUP98
MCODE submodule 7	DLAT	PDHA1	PDHB	PDK3
MCODE submodule 8	HSPA9	PMPCA	PMPCB
MCODE submodule 9	MRE11A	NBN	TP53BP1
# Overexpressed in CMS3 subtype
MCODE submodule 1	PRPF4	SF3B2	SNRPA	SRSF1	SRSF2	SRSF9
MCODE submodule 2	AP1M2	AP1S1	ARF1
MCODE submodule 3	CHMP2A	CHMP4A	TSG101
MCODE submodule 4	RPL13	RPL5	RPS24
# Overexpressed in CMS4 subtype
MCODE submodule 1 (Integrin-collagen complex)	COL4A1	COL4A2	COL4A3	COL4A5	COL5A1	COL5A2	ITGA5	ITGAV	ITGB1	ITGB5	ITGB6
MCODE submodule 2	CALD1	TPM1	TPM2	TPM4
MCODE submodule 3	HRG	PLG	SERPINF2	SPARC	TIMP1
MCODE submodule 4	ACTBL2	ACTR3B	CAP1	CAP2
MCODE submodule 5	APOC3	APOE	HSPG2	LRP1
MCODE submodule 6 (MAPK3 complex)	GNB4	GNG12	MAPK3	PRKCA
MCODE submodule 7	RPL3L	SPCS2	SSR3

## Sheet: d
Subtype label	Protein	MCODE submodule number	Druggable gene	DGI interaction	DGI interaction: Drug name and interaction type
CMS1	CUL1	1	FALSE	FALSE
CMS1	PSMB2	1	TRUE	TRUE	BORTEZOMIB; antagonist & other/unknown & n/a | MLN-9708; n/a | OPROZOMIB; n/a | CARFILZOMIB; other/unknown & n/a | N-[(1R)-1-(DIHYDROXYBORYL)-3-METHYLBUTYL]-N-(PYRAZIN-2-YLCARBONYL)-L-PHENYLALANINAMIDE; n/a | (3AR,6R,6AS)-6-((S)-((S)-CYCLOHEX-2-ENYL)(HYDROXY)METHYL)-6A-METHYL-4-OXO-HEXAHYDRO-2H-FURO[3,2-C]PYRROLE-6-CARBALDEHYDE; n/a
CMS1	PSMC4	1	FALSE	TRUE	BORTEZOMIB; other/unknown | CARFILZOMIB; other/unknown
CMS1	PSMD11	1	FALSE	TRUE	CARFILZOMIB; other/unknown | BORTEZOMIB; other/unknown
CMS1	PSMD12	1	FALSE	TRUE	BORTEZOMIB; other/unknown | CARFILZOMIB; other/unknown
CMS1	PSMD3	1	FALSE	TRUE	CARFILZOMIB; other/unknown | BORTEZOMIB; other/unknown
CMS1	PSMD8	1	FALSE	TRUE	CARFILZOMIB; other/unknown | BORTEZOMIB; other/unknown
CMS1	PSMD9	1	FALSE	TRUE	BORTEZOMIB; other/unknown | CARFILZOMIB; other/unknown
CMS1	PSME2	1	FALSE	TRUE	CARFILZOMIB; other/unknown | BORTEZOMIB; other/unknown
CMS1	MCM2	2	FALSE	FALSE
CMS1	MCM3	2	FALSE	FALSE
CMS1	MCM4	2	FALSE	FALSE
CMS1	MCM5	2	FALSE	FALSE
CMS1	MCM6	2	FALSE	FALSE
CMS1	MCM7	2	FALSE	FALSE
CMS1	RPA1	2	FALSE	FALSE
CMS1	RPA3	2	FALSE	FALSE
CMS1	SSRP1	2	FALSE	FALSE
CMS1	ADAR	3	FALSE	FALSE
CMS1	CCT2	3	FALSE	FALSE
CMS1	CCT4	3	FALSE	FALSE
CMS1	CCT5	3	FALSE	FALSE
CMS1	IFI35	3	FALSE	FALSE
CMS1	IPO4	3	FALSE	TRUE	MKC-1; n/a
CMS1	ISG15	3	FALSE	TRUE	IRINOTECAN; inhibitor & inhibitor
CMS1	KPNB1	3	FALSE	FALSE
CMS1	PCNA	3	FALSE	TRUE	VIT-100; n/a
CMS1	POLD1	3	TRUE	FALSE
CMS1	POLD2	3	FALSE	FALSE
CMS1	PPP2CA	3	FALSE	TRUE	(2S,3S,4E,6E,8S,9S)-3-AMINO-9-METHOXY-2,6,8-TRIMETHYL-10-PHENYLDECA-4,6-DIENOIC ACID; n/a | 2,6,8-TRIMETHYL-3-AMINO-9-BENZYL-9-METHOXYNONANOIC ACID; n/a | VITAMIN E; n/a
CMS1	PPP2CB	3	FALSE	TRUE	VITAMIN E; n/a
CMS1	PPP4C	3	FALSE	FALSE
CMS1	RFC4	3	FALSE	FALSE
CMS1	CD44	4	FALSE	TRUE	HYALURONAN; n/a
CMS1	GBP1	4	FALSE	FALSE
CMS1	HLA-DRB5	4	FALSE	TRUE	1D09C3; n/a
CMS1	DNAJC8	5	FALSE	FALSE
CMS1	SF3A3	5	FALSE	FALSE
CMS1	SRRM1	5	FALSE	FALSE
CMS1	SRSF9	5	FALSE	FALSE
CMS1	FGA	6	TRUE	TRUE	SUCRALFATE; antagonist | ALPHA-D-MANNOSE; n/a | RETEPLASE; n/a | TENECTEPLASE; n/a | ANISTREPLASE; n/a | ALTEPLASE; n/a | RECOMBINANT FACTOR IX FC FUSION PROTEIN; n/a | ALFIMEPRASE; n/a | EPTIFIBATIDE; n/a | ABCIXIMAB; n/a | TIROFIBAN; n/a
CMS1	FGB	6	TRUE	TRUE	SUCRALFATE; antagonist | RECOMBINANT FACTOR IX FC FUSION PROTEIN; n/a | ALFIMEPRASE; n/a | TIROFIBAN; n/a | EPTIFIBATIDE; n/a | ABCIXIMAB; n/a
CMS1	FGG	6	TRUE	TRUE	SUCRALFATE; antagonist | ALFIMEPRASE; n/a | RECOMBINANT FACTOR IX FC FUSION PROTEIN; n/a | TIROFIBAN; n/a | ABCIXIMAB; n/a | EPTIFIBATIDE; n/a
CMS1	ITGAM	6	TRUE	FALSE
CMS1	ITGB2	6	TRUE	TRUE	SIMVASTATIN; other/unknown | SAR 1118; n/a
CMS1	MRTO4	7	FALSE	FALSE
CMS1	RPL22L1	7	FALSE	FALSE
CMS1	RPL26L1	7	FALSE	TRUE	ALPHA-HYDROXY-BETA-PHENYL-PROPIONIC ACID; n/a | PUROMYCIN; n/a | ANISOMYCIN; n/a
CMS1	RPL35A	7	FALSE	FALSE
CMS1	RPL9	7	FALSE	FALSE
CMS1	GBP2	8	FALSE	FALSE
CMS1	GMPS	8	FALSE	TRUE	L-GLUTAMIC ACID; n/a
CMS1	OAS2	8	FALSE	FALSE
CMS1	OAS3	8	FALSE	FALSE
CMS1	YARS	8	FALSE	TRUE	L-TYROSINE; n/a | TYROSINAL; n/a | N6-ISOPENTENYL-ADENOSINE-5'-MONOPHOSPHATE; n/a | PARA-(BENZOYL)-PHENYLALANINE; n/a | BETA-(2-NAPHTHYL)-ALANINE; n/a | 4-(2,2,2-TRIFLUOROETHYL)-L-PHENYLALANINE; n/a
CMS1	EIF4A1	9	FALSE	FALSE
CMS1	EIF4A2	9	FALSE	FALSE
CMS1	UBE2L6	9	FALSE	FALSE
CMS1	ATP6V1A	10	FALSE	TRUE	CRUENTAREN; inhibitor | BAFILOMYCIN B1; inhibitor | ETIDRONIC ACID; inhibitor | TILUDRONATE; inhibitor | ALENDRONATE; inhibitor | BAFILOMYCIN A1; inhibitor
CMS1	ATP6V1B2	10	FALSE	TRUE	GALLIUM NITRATE; inhibitor | 4-(2-AMINOETHYL)BENZENESULFONYL FLUORIDE; n/a
CMS1	ATP6V1E1	10	FALSE	FALSE
CMS1	C4A	11	TRUE	TRUE	INTRAVENOUS IMMUNOGLOBULIN; binder
CMS1	C4B	11	TRUE	TRUE	INTRAVENOUS IMMUNOGLOBULIN; binder
CMS1	C4BPA	11	FALSE	FALSE
CMS1	DTX3L	12	FALSE	FALSE
CMS1	PARP14	12	TRUE	FALSE
CMS1	PARP9	12	TRUE	FALSE
CMS1	EZR	13	FALSE	FALSE
CMS1	RDX	13	FALSE	TRUE	D-MYO-INOSITOL-1,4,5-TRIPHOSPHATE; n/a
CMS1	ROCK1	13	TRUE	TRUE	HYDROXYFASUDIL; inhibitor | SAR407899; inhibitor | RHO-KINASE INHIBITOR; inhibitor | CETHRIN; inhibitor | AR-12286; n/a | INS117548; n/a | Y27632; n/a | (R)-TRANS-4-(1-AMINOETHYL)-N-(4-PYRIDYL) CYCLOHEXANECARBOXAMIDE; n/a | 5-(1,4-DIAZEPAN-1-SULFONYL)ISOQUINOLINE; n/a | (S)-2-METHYL-1-[(4-METHYL-5-ISOQUINOLINE)SULFONYL]-HOMOPIPERAZINE; n/a
CMS2	DDX18	1	FALSE	FALSE
CMS2	GTPBP4	1	FALSE	FALSE
CMS2	PES1	1	FALSE	FALSE
CMS2	RBM28	1	FALSE	FALSE
CMS2	RSL1D1	1	FALSE	FALSE
CMS2	WDR12	1	FALSE	FALSE
CMS2	CCAR1	2	FALSE	FALSE
CMS2	DDX27	2	FALSE	FALSE
CMS2	DHX9	2	FALSE	FALSE
CMS2	EIF6	2	FALSE	FALSE
CMS2	HNRNPU	2	TRUE	FALSE
CMS2	NOP56	2	FALSE	FALSE
CMS2	NOP58	2	FALSE	FALSE
CMS2	PDCD11	2	FALSE	FALSE
CMS2	PRPF6	2	FALSE	FALSE
CMS2	RRP12	2	FALSE	FALSE
CMS2	SF3B3	2	FALSE	FALSE
CMS2	SNRPA1	2	FALSE	FALSE
CMS2	CKAP5	3	FALSE	FALSE
CMS2	MAPRE1	3	FALSE	FALSE
CMS2	TUBA1C	3	TRUE	TRUE	EPOTHILONE B; n/a | 2-MERCAPTO-N-[1,2,3,10-TETRAMETHOXY-9-OXO-5,6,7,9-TETRAHYDRO-BENZO[A]HEPTALEN-7-YL]ACETAMIDE; n/a | EPOTHILONE D; n/a
CMS2	TUBA4A	3	TRUE	TRUE	PODOFILOX; inhibitor | VINCRISTINE; inhibitor & n/a | CABAZITAXEL; binder & n/a | EPOTHILONE D; n/a | EPOTHILONE B; n/a
CMS2	TUBB4A	3	TRUE	FALSE
CMS2	COPS4	4	FALSE	FALSE
CMS2	CUL4A	4	FALSE	FALSE
CMS2	CUL4B	4	FALSE	FALSE
CMS2	DDB1	4	FALSE	FALSE
CMS2	CTNND1	5	FALSE	FALSE
CMS2	CTTN	5	FALSE	FALSE
CMS2	EPB41L1	5	FALSE	FALSE
CMS2	SRC	5	TRUE	TRUE	XL228; inhibitor & n/a | KX2-391; inhibitor & n/a | DASATINIB; inhibitor & multitarget & n/a | BOSUTINIB; inhibitor & n/a | SARACATINIB; inhibitor & n/a | XL999; inhibitor | ENMD-2076; n/a | MASITINIB; n/a | PONATINIB; n/a | GSK-3 INHIBITOR XIII; n/a | SU6656; n/a | SYK INHIBITOR III; n/a | RU82209; n/a | PAS219; n/a | N6-BENZYL ADENOSINE-5'-DIPHOSPHATE; n/a | RU82197; n/a | RU79072; n/a | PASBN;…
CMS2	YWHAB	5	FALSE	FALSE
CMS2	YWHAQ	5	FALSE	FALSE
CMS2	YWHAZ	5	FALSE	FALSE
CMS2	MRPL1	6	FALSE	FALSE
CMS2	MRPL13	6	FALSE	FALSE
CMS2	MRPL15	6	FALSE	FALSE
CMS2	NUP153	6	TRUE	FALSE
CMS2	NUP35	6	FALSE	FALSE
CMS2	NUP88	6	FALSE	FALSE
CMS2	NUP93	6	FALSE	FALSE
CMS2	NUP98	6	FALSE	FALSE
CMS2	DLAT	7	FALSE	TRUE	NADH; n/a | RADICICOL; n/a | DIHYDROLIPOIC ACID; n/a
CMS2	PDHA1	7	FALSE	TRUE	CPI-613; n/a | NADH; n/a
CMS2	PDHB	7	FALSE	TRUE	PYRUVIC ACID; n/a | NADH; n/a | DEXLIPOTAM; n/a | CPI-613; n/a
CMS2	PDK3	7	TRUE	TRUE	RADICICOL; n/a | DIHYDROLIPOIC ACID; n/a | CPI-613; n/a
CMS2	HSPA9	8	FALSE	FALSE
CMS2	PMPCA	8	TRUE	FALSE
CMS2	PMPCB	8	TRUE	FALSE
CMS2	MRE11A	9	FALSE	FALSE
CMS2	NBN	9	FALSE	FALSE
CMS2	TP53BP1	9	FALSE	FALSE
CMS3	PRPF4	1	FALSE	FALSE
CMS3	SF3B2	1	FALSE	FALSE
CMS3	SNRPA	1	FALSE	TRUE	MALONIC ACID; n/a
CMS3	SRSF1	1	FALSE	FALSE
CMS3	SRSF2	1	FALSE	FALSE
CMS3	SRSF9	1	FALSE	FALSE
CMS3	AP1M2	2	FALSE	FALSE
CMS3	AP1S1	2	FALSE	FALSE
CMS3	ARF1	2	FALSE	TRUE	1,3-PROPANDIOL; n/a | 1,6,7,8,9,11A,12,13,14,14A-DECAHYDRO-1,13-DIHYDROXY-6-METHYL-4H-CYCLOPENT[F]OXACYCLOTRIDECIN-4-ONE; n/a | MYRISTIC ACID; n/a | GUANOSINE-3'-MONOPHOSPHATE-5'-DIPHOSPHATE; n/a | GUANOSINE-5'-TRIPHOSPHATE; n/a | GLYCEROL; n/a | GUANOSINE-5'-DIPHOSPHATE; n/a
CMS3	CHMP2A	3	FALSE	FALSE
CMS3	CHMP4A	3	FALSE	FALSE
CMS3	TSG101	3	FALSE	FALSE
CMS3	RPL13	4	FALSE	TRUE	DOCETAXEL; n/a | THALIDOMIDE; n/a
CMS3	RPL5	4	FALSE	FALSE
CMS3	RPS24	4	FALSE	FALSE
CMS4	COL4A1	1	FALSE	FALSE
CMS4	COL4A2	1	FALSE	FALSE
CMS4	COL4A3	1	FALSE	FALSE
CMS4	COL4A5	1	FALSE	FALSE
CMS4	COL5A1	1	FALSE	FALSE
CMS4	COL5A2	1	FALSE	FALSE
CMS4	ITGA5	1	TRUE	TRUE	JSM 6427; antagonist & n/a | PF-04605412; antibody | VOLOCIXIMAB; antibody | VITAXIN; antibody | F200; n/a | CILENGITIDE; n/a | GLPG0187; n/a
CMS4	ITGAV	1	TRUE	TRUE	L-000845704; antagonist | ANTITHYMOCYTE GLOBULIN; n/a | VOLOCIXIMAB; n/a | CNTO-95; n/a | CILENGITIDE; n/a | GLPG0187; n/a
CMS4	ITGB1	1	TRUE	TRUE	VOLOCIXIMAB; antibody & n/a | JSM 6427; antagonist & n/a | R411; antagonist | VITAXIN; antibody | PF-04605412; antibody | FIRATEGRAST; n/a | ATL1102; n/a | ANTITHYMOCYTE GLOBULIN; n/a | SAN-300; n/a | F200; n/a | R1295; n/a | GLPG0187; n/a
CMS4	ITGB5	1	TRUE	TRUE	CILENGITIDE; n/a | GLPG0187; n/a | CNTO-95; n/a
CMS4	ITGB6	1	TRUE	TRUE	GLPG0187; n/a
CMS4	CALD1	2	FALSE	FALSE
CMS4	TPM1	2	FALSE	FALSE
CMS4	TPM2	2	FALSE	FALSE
CMS4	TPM4	2	FALSE	FALSE
CMS4	HRG	3	TRUE	FALSE
CMS4	PLG	3	TRUE	TRUE	TRANEXAMIC ACID; inhibitor & n/a | AMINOCAPROIC ACID; inhibitor & n/a | UROKINASE; activator & n/a | DESMOTEPLASE; n/a | ANTITHROMBIN; n/a | AMEDIPLASE; n/a | TENECTEPLASE; activator & n/a | STREPTOKINASE; activator & n/a | ANISTREPLASE; activator & n/a | PLASMIN; n/a | RETEPLASE; activator & n/a | ALTEPLASE; activator & n/a | BICINE; n/a | APROTININ; n/a | BIS-TRIAZOLE DERIVATIVE 10; n/a | 6-AMI…
CMS4	SERPINF2	3	TRUE	FALSE
CMS4	SPARC	3	FALSE	TRUE	NAB-PACLITAXEL; n/a
CMS4	TIMP1	3	TRUE	FALSE
CMS4	ACTBL2	4	FALSE	FALSE
CMS4	ACTR3B	4	FALSE	FALSE
CMS4	CAP1	4	FALSE	FALSE
CMS4	CAP2	4	FALSE	FALSE
CMS4	APOC3	5	FALSE	TRUE	ISIS-APOCIII; antisense | PROTEASE INHIBITORS; n/a | RITONAVIR; n/a
CMS4	APOE	5	FALSE	TRUE	SERUM ALBUMIN IODONATED; n/a | HUMAN SERUM ALBUMIN; n/a | SIMVASTATIN; n/a | HMG COA REDUCTASE INHIBITORS; n/a | ANTIVIRALS FOR TREATMENT OF HIV INFECTIONS, COMBINATIONS; n/a | PRAVASTATIN; n/a | RITONAVIR; n/a
CMS4	HSPG2	5	FALSE	TRUE	PALIFERMIN; n/a | ANTIPSYCHOTICS; n/a
CMS4	LRP1	5	FALSE	TRUE	TENECTEPLASE; n/a | ANTIHEMOPHILIC FACTOR; modulator | COAGULATION FACTOR IX; n/a
CMS4	GNB4	6	FALSE	FALSE
CMS4	GNG12	6	FALSE	FALSE
CMS4	MAPK3	6	TRUE	TRUE	PURVALANOL; inhibitor | SULINDAC; inhibitor | ERK INHIBITOR II; n/a | SORAFENIB; n/a | 5-IODOTUBERCIDIN; n/a | ARSENIC TRIOXIDE; inducer & n/a | RDEA119; n/a
CMS4	PRKCA	6	TRUE	TRUE	SOTRASTAURIN ACETATE; inhibitor | ENZASTAURIN; inhibitor & n/a | MIDOSTAURIN; inhibitor | SOPHORETIN; inhibitor | PHOSPHATIDYLSERINE; n/a | VITAMIN E; n/a | BRYOSTATIN; n/a | BRYOSTATIN-1; n/a | INGENOL MEBUTATE; n/a | AFFINITAC; antisense oligonucleotide | RUBOXISTAURIN; n/a | G&OUML; 6976; n/a
CMS4	RPL3L	7	FALSE	FALSE
CMS4	SPCS2	7	TRUE	FALSE
CMS4	SSR3	7	FALSE	FALSE
